## **TRIM7 restricts Coxsackievirus and norovirus infection by detecting the C-terminal glutamine generated by 3C protease processing**

Jakub Luptak<sup>1</sup>, Donna Mallery<sup>1</sup>, Aminu S. Jahun<sup>2</sup>, Anna Albecka<sup>1</sup>, Dean Clift<sup>1</sup>, Osaid Ather<sup>1</sup>, Greg Slodkowicz<sup>2</sup>, Ian Goodfellow<sup>3</sup>, Leo James<sup>1</sup>

<sup>1</sup>MRC Laboratory of Molecular Biology, Francis Crick Avenue, Cambridge, CB2 0QH, United Kingdom

<sup>2</sup>The Francis Crick Institute, London, United Kingdom

<sup>3</sup>Division of Virology, Department of Pathology, University of Cambridge, Addenbrooke's Hospital, Cambridge CB2 0QQ, UK.

## Abstract

TRIM7 catalyses the ubiquitination of multiple substrates with unrelated biological functions. This cross-reactivity is at odds with the specificity usually displayed by enzymes, including ubiquitin ligases. Here we show that TRIM7's extreme substrate promiscuity is due to a highly unusual binding mechanism, in which the PRYSPRY domain captures any ligand with a C-terminal helix that terminates in a hydrophobic residue followed by a glutamine. Many of the non-structural proteins found in RNA viruses contain C-terminal glutamines as a result of polyprotein cleavage by 3C protease. This viral processing strategy generates novel substrates for TRIM7 and explains its ability to inhibit Coxsackie virus and norovirus replication. In addition to viral proteins, cellular proteins such as glycogenin have evolved C-termini that make them a TRIM7 substrate. The 'helix-ΦQ' degron motif recognised by TRIM7 is reminiscent of the N-end degron system and is found in ~ 1% of cellular proteins. These features, together with TRIM7's restricted tissue expression and lack of immune regulation suggest that viral restriction may not be its physiological function.

## Introduction

TRIM proteins comprise the largest family of E3 ligases in mammals. They are characterised by a tripartite motif of RING, B-Box and coiled-coil and may encode additional domains, of which the PRYSPRY domain is the most common. Many TRIM proteins have proposed roles in infection and immunity (for recent review see (Koepke et al., 2021). Most inhibit viral replication and are characterised as restriction factors, but some are reported to promote replication (Bharaj et al., 2017; Giraldo et al., 2020). A common mechanism is often reported, in which the TRIM binds a viral protein and causes it to be degraded via ubiquitination. Targeting is usually mediated by the C-terminal PRYSPRY domain, whilst ubiquitination is catalysed by the N-terminal RING domain, although TRIMs have been reported to degrade their target even though they lack a RING (Wu et al., 2019). Common targets for degradation include the viral capsid or nucleocapsid: TRIM5 (Stremlau et al., 2004), TRIM11 (Yuan et al., 2016), & TRIM34 (Ohainle et al., 2020) are reported to target the capsid of HIV and TRIM14 (Wu et al., 2019), TRIM22 (Di Pietro et al., 2013) & TRIM41 (Patil et al., 2020) the nucleocapsid of Influenza.

Antiviral TRIMs have also been shown to stimulate immune signalling, providing a second mechanism of viral inhibition. Some TRIMs work indirectly by promoting the activity of pattern-recognition receptors (PRRs). For instance, TRIM65 is reported to K63-polyubiquitinate MDA5 and promote its signalling (Lang et al., 2017). RIPLET, technically not a TRIM but containing RING, coiled-coil and PRYSPRY domains, modifies RIG-I with K63-chains and stimulates its activity (Cadena et al., 2019; Oshiumi et al., 2009), while TRIM56 is implicated in DNA sensing by promoting the activity of cGAS (Seo et al., 2018). Other TRIMs promote signalling directly as primary PRRs. TRIM5 and TRIM21 both stimulate innate immune signalling upon detection of incoming virions. This activity occurs in parallel with their direct-acting restriction mechanisms, in which targeted viral capsids are degraded. The restriction and signalling activities of both TRIM5 and TRIM21 are inextricably linked: synthesis of K63-polyubiquitination leads to proteasomal recruitment, followed by concomitant liberation of free K63-chains and protein degradation.

Exactly how many members of the TRIM family are involved in antiviral immunity, what proportion directly restrict or rather promote immune signalling and which are capable of both is unknown. In a transient over-expression screen of 36 human and 19 mouse TRIMs, over one third were found to possess antiretroviral activity (Uchil et al., 2008). In a follow-up study, 16 out of 43 over-expressed human TRIMs were shown to induce NF- $\kappa$ B or AP-1 signalling (Uchil et al., 2013). Tellingly, there was a close correspondence between restriction and signalling; of 17 TRIMs that restricted MLV, 12 were also immune stimulatory. A more recent over-expression screen of 118 RING E3 ligases (including over 50 TRIMs) identified TRIM7 as a potent inhibitor of picornavirus Coxsackievirus B3 (CVB3) (Fan et al., 2021). Restriction required PRYSPRY binding to viral protein 2BC, followed by its RING-dependent ubiquitination and degradation. TRIM7 was also previously identified in a genome-wide overexpression screen as an inhibitor of the picorna-like virus calicivirus murine norovirus (MNV), an activity similarly found to be PRYSPRY-dependent (Orchard et al., 2019). However, these reports of antiviral activity are at odds with other TRIM7 studies. TRIM7 has been proposed as a pro-viral factor in Zika virus infection, where it was shown to K63-polyubiquitinate the viral envelope protein (Giraldo et al., 2020). TRIM7 has also been reported as an agonist of TLR4-mediated signalling in macrophages (Lu et al., 2019), as a tumour suppressor through degradation of Src (Zhu et al., 2020), as an oncogene through the K63-ubiquitination and stabilisation of AP-1 co-activator RACO-1 (Chakraborty et al., 2015) and as an interactor and regulator of glycogenin – the latter activity giving rise to TRIM7's original designation as 'glycogenin-interacting protein' (GNIP)(Skurat et al., 2002). There is little that connects these disparate cellular roles.

In this study we sought to determine how TRIM7 is capable of interacting with such diverse substrates and the mechanism by which it targets viral proteins for degradation. We show that the PRYSPRY domain of TRIM7 possesses a unique binding site that promiscuously interacts with proteins containing a C-terminal ending in a helix- $\Phi$ Q motif. The reason why TRIM7 has been reported to bind glycogenin-1 (GYG1), RACO-1 and CVB3 2BC is because they all possess this structural signature. We also show that it is this promiscuous helix- $\Phi$ Q motif that allows TRIM7 to restrict infection by both norovirus and Coxsackievirus. These viruses possess a viral 3C-protease that cleaves their polyproteins to generate viral proteins ending in glutamine. A TRIM7 point mutant that no longer binds this glutamine motif loses all viral restriction. 3C-like proteases are common to positive-strand RNA viruses from the *Picornaviridae*, *Caliciviridae*, and *Coronaviridae* families and all generate viral proteins with C-terminal glutamines that are potential substrates for TRIM7. However, we show that despite possessing multiple proteins ending in glutamine, SARS-CoV-2 is not restricted by TRIM7. Moreover, the tissue expression of TRIM7 and its gene regulation is not consistent with an antiviral TRIM such as TRIM5 or TRIM21, suggesting that its described function as a restriction factor may be an artefact of overexpression.

## Results

### TRIM7 binds a linear epitope of GYG1

TRIM7 is a canonical TRIM protein with the same domain architecture of RING, B Box, Coiled-coil and PRYSPRY as the antiviral TRIM proteins TRIM5 and TRIM21 (Figure 1A). To understand how TRIM7 can interact with multiple diverse substrates we initially focused on its originally reported ligand, rabbit Glycogenin-1 (rbGYG1) (Skurat et al., 2002). Previously, the PRYSPRY domain was reported to be responsible for mediating binding (Zhai et al., 2004), consistent with other TRIM proteins. Using recombinant proteins, we probed the interaction of TRIM7-PRYSPRY (PRYSPRY) with nested truncations of the rbGYG1 protein using ITC (Figure 1B). PRYSPRY clearly interacted with the full-length protein with an affinity of 2.3  $\mu$ M. This interaction was maintained in different orthologues of TRIM7 and GYG1 (Figure S1A-C). Glycogenin is an ancient enzyme found in early unicellular eukaryotes but while the catalytic domain is highly conserved, the C-terminal sequence has undergone more recent divergence. Binding to TRIM7 was maintained when the catalytic domain was deleted, suggesting a possible regulatory relationship. The non-catalytic region could be subdivided further into a variable region (VR) that differs between classes and a C-terminal section that is relatively conserved in vertebrate subphylum ('conserved in vertebrates'; CIV). Binding was maintained to a minimal construct comprising the CIV alone ( $K_D = 5.2 \pm 0.3 \mu$ M) but lost when this region was deleted (Figure 1B and Figure S1D-E). Structural prediction of the CIV region suggested it contains two  $\alpha$ -helices. We therefore synthesised peptides corresponding to these predicted helices and found that a peptide comprising the 12 carboxy-terminal (C-term) residues (DNIKKKLDTYLQ – GYG<sub>322-333</sub>) was sufficient to maintain TRIM7 binding (Figure 1B). Co-crystallisation of the PRYSPRY with the GYG<sub>322-333</sub> peptide confirmed binding and the helical nature of the GYG<sub>322-333</sub> epitope (Table 1S, Figure 1C, left). TRIM7 binding takes place at the same location within the PRYSPRY as used by TRIM21 PRYSPRY to bind its ligand, IgG Fc, further indicating that this is a specific interaction (Figure 1C, right).

### Cellular and viral substrates of TRIM7 terminate with a glutamine

Having identified the precise epitope within GYG1 bound by TRIM7, we searched for a similar sequence in TRIM7s other reported ligands. RACO-1 contains no similar epitope but we noted that it also has a C-terminus ending in 'LQ'. Furthermore, TRIM7 has been reported as a restriction factor for the picornavirus CVB3 and the calicivirus MNV. The genome of picornaviruses, and many other positive-stranded RNA viruses such as SARS-CoV-2, encode their major replicase components a single polypeptide that is subsequently processed into individual proteins by the viral 3C protease (3Cpro).

Importantly, 3Cpro cleaves after glutamine (Q), meaning this is the C-terminal residue of many of the viral proteins. CVB3 contains 8 proteins ending in Q, while MNV1 contains two (Figure 2A). We hypothesised that this C-terminal Q may be the motif that TRIM7 recognises, explaining its promiscuous binding. To test this, we synthesised peptides corresponding to the C-termini of RACO-1, CVB3 2BC, which was identified as a possible ligand, and both MNV NS6 and NS3 (Figure 2B and Figure S1J). A peptide corresponding to hGYG1 was also synthesised as a positive control (GYG1<sub>339-350</sub>). Remarkably, in ITC experiments with TRIM7 PRYSPRY, all peptides bound with comparable affinity (Figure 2D, Figure S1F-K and Table S2).

### **Crystals structures of TRIM7 bound to substrate peptides reveal a common $\Phi$ Q binding mechanism**

Solving co-crystal structures of each complex (Figure 2B-D, Figure S2A-D and F), revealed that the different peptides bound in the same PRYSPRY pocket, with the penultimate two residues responsible for most of the binding interaction. In each case, there is the potential for hydrogen bonds between the terminal glutamine residue and TRIM7 residues N383, R385, G408, Q436 and S499 (Figure 2C and D). An additional hydrogen bond is also formed between the peptidyl oxygen of the penultimate peptide residue (L or F) and the peptidyl nitrogen of TRIM7 residue T384. We tested the importance of these residues in ITC binding experiments (Figure 2D). Mutants N383A, R385A, F426 and Q436A abolished binding to all tested peptides, whilst T384A bound with reduced affinity (Figure 2D & Figure S3). Finally, mutation L423A effectively abolished binding but a weak interaction could still be detected. These results are consistent with the side-chains of R385 and Q436 participating in binding and only the main-chain of T384. It is surprising that the bidentate salt bridge formed with R385 by the carboxylic acid of each peptide seems to play such an important role given this interaction has no inherent residue specificity. Interesting, an apo structure of TRIM7 was recently solved in which one of several malonate ions coordinated by the protein mimics both this carboxylic acid:R385salt-bridge and the hydrogen bond with the main-chain of T384 (Figure S2E). Investigating this further, we found that mutating the C-terminal glutamine in the 2BC peptide to alanine abolished binding (Figure 2E). This suggests that interaction between the glutamine side-chain and Q436 in TRIM7 may be necessary to position the carboxy terminus for binding to R385. As 3Cpro occasionally cleaves after a glutamate, we also tested whether this residue is also accommodated by TRIM7. However, a glutamine to glutamate substitution also abolished binding. This suggests that despite binding being driven by a seemingly nonspecific interaction involving a free carboxy termini, there is exquisite sequence specificity. The penultimate residue in 3Cpro cleavage is more variable. For instance, CVB3 proteins end with 'AQ', 'RQ', 'EQ', 'HQ', 'FQ' and 'VQ'. However, binding was only maintained in an 'FQ' peptide (Figure 2E). Previously, residue T323 was suggested as important in TRIM7 restriction of CVB3, as an T323A mutation allowed the virus to escape TRIM7 restriction (Fan et al., 2021). However, the T323A mutation had no effect on binding, suggesting that this escape mutant may be altering viral fitness independent of TRIM7 (Figure 2E), or disrupting binding in the context of the full protein. To confirm these results with an independent method, we tested all of our 2BC peptides for TRIM7 interaction using differential scanning fluorimetry. We only observed an increase in PRYSPRY thermostability upon addition of 2BC peptides ending in 'FQ' (Figure 2F).

### **Constrained C terminal $\Phi$ Q motif is sufficient to explain monomeric TRIM7 binding, but the interaction is more potent when both TRIM7 and substrate are dimeric**

The above data suggest that TRIM7 can interact with proteins ending in either 'LQ' or 'FQ'. To determine whether these residues alone are sufficient for binding, we compared the dipeptide LQ with ac-LQ and ac-LLQ. These bound with increasing affinity from 200 to 39  $\mu$ M. Next, we compared binding of a simple polyA peptide with one where the last two residues were LQ (Figure 2E). While no binding could be detected for polyA, binding of 8  $\mu$ M was measured for AAAAALQ – same as that of the peptides from identified TRIM7 ligands. Taken together, these data indicate that the L/FQ alone is

sufficient for TRIM7 binding, but it needs to be presented in a constrained format, as seen with increasing affinity from the dipeptide to the full protein. In the context of TRIM7 as a restriction factor, this means that CVB3 proteins VP3, 3A and 2C are possible TRIM7 ligands and MNV proteins NS3 and NS6. More generally, our results define TRIM7 ligands as proteins or peptides containing a C-terminal helix- $\Phi$ Q motif. However, although there are more than a hundred human proteins in ensemble that end with 'LQ' or 'FQ', most of these are unlikely to be TRIM7 substrates as other constraints such as steric accessibility are likely to play a factor. Affinity may also be important and those measured here represent monomer binding, whereas TRIM proteins like TRIM7 are dimers. To test how this may alter target affinity, we produced MBP-TRIM7-CC-PRYSPRY (CC-PS) and compared its binding to the GYG<sub>338-350</sub> peptide and a hexahistidine tagged GYG1 construct comprising the human GN1 isoform of GYG1 (Figure 2G-H and Figure S4). In case of the peptide, the affinity was virtually unchanged ( $15 \pm 6 \mu\text{M}$ ) but the N from the analysis ( $N = 1.7 \pm 0.8$ ) indicated 2 peptides were binding to the dimer, as expected. For the full-length protein, the affinity increased 100-fold ( $0.16 \pm 0.05 \mu\text{M}$ ) compared to the peptide or 10-fold from PRYSPRY-hsGYG1-GN1 interaction ( $K_D = 2.1 \pm 0.6$ ) with the N indicating binding is 1:1 between the dimers.

### **TRIM7 contains an active RING E3 domain capable of self-ubiquitination**

TRIM7 has been shown to induce degradation of CVB3 2BC by catalysing K48-chain ubiquitination, a signal for proteasomal recruitment (Fan et al., 2021). This is similar to related proteins TRIM5 and TRIM21 which catalyse ubiquitination of their substrates via their E3 RING domains, leading to substrate degradation and immune signalling via K48- and K63-linked ubiquitin chain synthesis. K48-chains are a signal for proteasomal recruitment, whereas K63-chains are immune second messengers that activate multiple signalling hubs such as TAK1 and TBK1. TRIM5 and TRIM21 first use the E2 Ube2W to monoubiquitinate their own N-termini. This monoubiquitin then acts as a primer for K63-chain extension by the heterodimeric E2 Ube2N/2V2. To investigate whether TRIM7 utilises this same mechanism, we carried out a series of *in vitro* ubiquitination reactions using these E2s (Figure 3A and B). Incubation with Ube2W resulted in monoubiquitination of the TRIM7 RING, whilst Ube2N/2V2 did not modify the protein. However, addition of both Ube2W and Ube2N/2V2 together resulted in modification of TRIM7 with an extended ubiquitin chain (Figure 3C). To confirm that the TRIM7 RING is not simply the substrate for ubiquitination but is catalysing the reaction, we performed discharge experiments and measured the kinetics of ubiquitin release from pre-charged Ube2N. Addition of TRIM7 RING substantially accelerated ubiquitin discharge from Ube2N, confirming that it is an active E3 ligase with this E2 enzyme (Figure 3D). Taken together, this shows that TRIM7 behaves similarly to TRIM5 and TRIM21 and can modify itself with K63-polyubiquitin. To demonstrate that the RING domain is active in the context of the full protein and in cells, we overexpressed different constructs of HA-TRIM7 in 293Ts (Figure 3F). Overexpression of WT and  $\Delta$ PRYSPRY constructs led to laddering consistent with its ubiquitination. Laddering was abolished upon over-expression of a  $\Delta$ RING construct.

### **TRIM7 binding in cells leads to co-degradation with the substrate**

Next, we investigated whether TRIM7 binding of helix- $\Phi$ Q substrates leads to degradation in cells. We designed an experiment (Figure 3G) where we co-transfected cells with plasmids encoding mCherry-Trim7 (mCh-T7) constructs (WT and R385A) and EGFP-hsGYG1-GN-1 (EGFP-GYG1) constructs (WT and Q333A). mCh-T7 formed puncta, consistent with the cytoplasmic bodies formed by many TRIM proteins (Figure 3H). When co-expressed, EGFP-GYG1 formed puncta that colocalised with mCh-T7 (Figure 3H and I; top row). Either Q333A substitution in GYG1 or R385A substitution in TRIM7 resulted in a loss of colocalization, suggesting that GYG1 is recruited to TRIM7 puncta through direct binding. To test if TRIM7 binding causes degradation of EGFP-GYG1, we quantified cellular protein levels by fluorescence microscopy (Figure 3J) and immunoblotting (Figure 3K and L). Strikingly, EGFP-GYG1

protein levels were ~3 times higher when binding to TRIM7 was prevented with either GYG1-Q333A or TRIM7-R385 substitutions, or the TRIM7 RING domain was deleted (dR). This data supports the hypothesis that TRIM7 targets helix-ΦQ substrates for degradation by direct binding and RING-dependent degradation. Importantly, we noted that TRIM7 is co-degraded alongside GYG1. This is a hallmark of TRIM ligases and similar co-degradation has been observed during the function of both TRIM5 and TRIM21 (Fletcher et al., 2018; Reymond et al., 2001; Zeng et al., 2021)

### **Restriction of viral replication of MNV1 and CVB3 is dependent on TRIM7 binding and substrate degradation but not its immune signalling activity**

As TRIM7 is reported to restrict both MNV1 and CVB3 viruses, we sought to understand if the antiviral effect was due to binding and subsequent degradation of 3Cpro-liberated viral proteins with accessible helix-ΦQ C-termini or an effect of immune signalling activation in cells overexpressing TRIM7. We performed a series of experiments where we expressed an increasing dose of TRIM7 along with known antiviral proteins TRIM5 and TRIM21, which in addition to directly restricting viruses by mediating their degradation, have also been shown to stimulate immune signalling pathways. This resulted in dose-dependent activation of both NF-κB and AP-1 pathways (Figure 4A-C). Strikingly, TRIM7 activated both pathways substantially more strongly than either TRIM5 or TRIM21 and sufficiently to induce transcription of antiviral cytokines TNF and CXCL10 (Figure 4E). Immune stimulation was dependent upon the RING domain but not the PRYSPRY, consistent with activity being induced by RING-mediated ubiquitination (Figure 4C). Consistent with this, the R385A mutant did not prevent TRIM7 from activating NF-κB (Figure 4E). Next, we generated cell lines stably expressing various TRIM7 constructs (Figure 4F and Figure S5) in HeLa cells expressing the MNV1 receptor CD300lf. These cells were then used in infection experiments using recombinant CVB3-GFP and WT MNV1 virus (Figure 4G). For CVB3, the fraction of infected cells was quantified using an IncuCyte (Figure 4H). Cells expressing WT TRIM7 were able to reduce CVB3 infection by ~ 4-fold but neither ΔRING, ΔPRYSPRY or R385A constructs were capable of restriction. For MNV1, infection levels were quantified by TCID<sub>50</sub> (Figure 4I). Here the antiviral effect was even more striking, with WT TRIM7 expressing cells reducing MNV1 infection levels by 3-4 log<sub>10</sub>. Again, this activity was completely lost in constructs R385A or ΔPRYSPRY where binding to substrate was abolished. There was some loss of infection in cells expressing ΔRING, which may indicate that binding of TRIM7 to viral proteins alone partially disrupts their function. Importantly however, because immune signalling is PRYSPRY and R385A-independent, whereas viral restriction is lost in ΔPRYSPRY and R385A cells, our data suggests that TRIM7 antiviral activity is dependent upon binding and degradation and not activating innate immune pathways. Many ssRNA viruses produce a polyprotein that is cleaved by a virally-encoded 3Cpro, including SARS-CoV-2. Analysis of SARS-CoV-2 suggests there are 10 viral proteins that possess an 'LQ' or 'FQ' and thus are potential substrates for TRIM7 (Figure S6A). To test whether TRIM7 can restrict SARS-CoV-2 we used the TRIM7/CD300lf HeLa cells that restrict both MNV1 and CVB3 and stably transduced them with hACE2 to make them permissive for SARS-CoV-2 infection (Figure S6B). We infected these hACE2/TRIM7/CD300lf cells with the omicron variant BA.1 (EPI\_ISL\_7886688) at an MOI of 0.2 TCID<sub>50</sub>(Figure S6C). After 18hrs we measured viral replication by qPCR using probes against genomic viral RNA encoding N protein (Albecka et al., 2021; Ashraf et al., 2006). Unlike with MNV1 and CVB3, we observed no TRIM7 restriction of SARS-CoV-2 replication.

## Discussion

The data presented here show that TRIM7 targets diverse substrates through a highly unusual binding mechanism in which it recognizes a C-terminal helix- $\Phi$ Q motif. This mechanism explains the promiscuous binding reported for TRIM7 against unrelated proteins GYG1, RACO-1, 2C, NS3 and NS6. During preparation of our manuscript, similar data was deposited in bioRxiv (Liang et al., 2022) that TRIM7 binds to a  $\Phi$ Q motif. The helix- $\Phi$ Q motif recognized by TRIM7 is reminiscent of the N-end degron system. In the 'N-end rule' system (Bachmair et al., 1986), N-recognin proteins hydrogen bond with free  $\alpha$ -amino groups at protein N-termini (Sriram & Kwon, 2010). TRIM7 recognises the other end of proteins, using an arginine residue (R385) to form a bidentate salt bridge with the carboxylic acid at C-termini. Both systems also share similarities in how substrates can be generated. In the N-end system, proteolytic cleavage of N-terminal methionine exposes amino acids at the termini that are substrates for degradation. Likewise, proteolysis can reveal novel substrates for TRIM7 by exposing C-terminal glutamines. We propose that it is the action of 3C proteases that generates TRIM7 substrates and results in restriction of CVB3 and MNV1 infection. In support of our hypothesis, we show here that when C-terminal glutamine binding is abolished by mutating TRIM7 residue R385, CVB3 and MNV1 are no longer restricted.

As many positive-stranded RNA viruses utilise a 3C or 3C-like mechanism to liberate their proteins from an initial single polypeptide, there is the possibility that TRIM7 could function as a more broadly-acting restriction factor than antiretroviral ligase TRIM5. However, it is important to note that the ends generated by 3C proteases are not strictly conserved. For example, human norovirus proteins do not have identical C-termini as MNV1 proteins (e.g., in Norwalk virus NS6 ends in EGETALE rather than LEALEFQ, but NS3 maintains the LQ end). Moreover, not all viral proteins with a helix- $\Phi$ Q motif will be accessible in the context of a full-length protein or if the protein is sequestered during viral replication in the cells. As evidence of this, despite the fact that SARS-CoV-2 possess 10 proteins ending in 'LQ' or 'FQ', we observed no restriction of live SARS-CoV-2 virus. This was confirmed in cells expressing sufficient TRIM7 to restrict both MNV1 and CVB3. Our results are therefore in contrast to reports that TRIM7 can bind to and degrade multiple SARS-CoV-2 proteins including NSP5 and NSP8. It may be that binding does not happen during live virus infection or there is insufficient degradation to impact viral replication under the conditions tested here. Alternatively, SARS-CoV-2 may antagonize TRIM7 function.

An important question raised by this study is what the principle physiological function of TRIM7 actually is. Both CVB3 and MNV viral screens were based on TRIM7 over-expression, as were many of the other reports identifying TRIM7 ligands. Ectopic TRIM7 over-expression may have created conditions for binding and ubiquitination that do not exist under normal physiological conditions. The link between TRIM7s helix- $\Phi$ Q binding mechanism and 3C-protease processing may be coincidental. This question may require viral challenge experiments in TRIM7 knockout animals for a definitive answer. We have shown here that, in addition to its reported degradation activity, over-expressed TRIM7 stimulates signalling pathways, including AP-1 and NF- $\kappa$ B, by synthesizing K63-polyubiquitin. Dual signalling/effector function is a signature of *bona fide* antiviral TRIMs TRIM5 and TRIM21. Moreover, TRIM-based overexpression screens have previously identified multiple TRIMs with antiviral restriction and NF- $\kappa$ B activity. However, it is also possible that overexpression creates artefactual conditions for signalling. Over-expression can push TRIM proteins into forming cytoplasmic bodies that would not normally assemble under resting conditions and these bodies are a source of ubiquitination and downstream signal transduction.

Phylogeny provides an important perspective into TRIM7 function. TRIMs have undergone a rapid expansion in mammals: there are over 70 TRIMs in humans, whereas only 20 in worms and 10 in flies (Ozato et al., 2008). These recently expanded TRIMs comprise a sub-group ('group 2') that evolve at



a faster rate and contain a PRYSPRY domain (Sardiello et al., 2008). Most antiviral TRIMs belong to group 2, as does TRIM7, but TRIM7 is older than members such as TRIM21 that is only found in mammals. The evolutionary age of TRIM7 is a reasonable match to the appearance of the helix- $\Phi$ Q motif in glycogenin. Glycogenin arose in early eukaryotes but the final ~30 residues did not become fixed until jawed vertebrates and the helix- $\Phi$ Q motif only in amniotes (~319 Mya; Figure S7 and (Kumar et al., 2017). TRIM7 is present in birds and reptiles, suggesting it is slightly younger (~261 Mya; Figure S7 and (Kumar et al., 2017). Tissue expression is another useful predictor of function and in this respect TRIM7 and glycogenin are a much better match. Both proteins have a specific expression pattern and are found principally in skeletal muscle, liver, heart and the brain. However, this expression pattern is difficult to reconcile with a broad-acting antiviral restriction factor. It is possible that none of the currently identified TRIM7 interacting proteins are the natural substrate - indeed the real TRIM7 substrate may not be a protein at all but a metabolite. The malonate observed to bind apo TRIM7 makes the same core salt bridge as the glutamate side chain and carboxylic acid in the protein ligands. However, this moiety is not sufficient for full binding affinity, meaning that any natural metabolite would likely need to make additional interactions. Typically, an enzyme's function is revealed with its substrate, but TRIM7's unusual binding mechanism obscures such an approach. Future work will need to focus on TRIM7 in the tissues where it is naturally found, using knockout approaches and whole organism models.

## Figure Legends

**Figure 1. A linear epitope of GYG1 is sufficient to explain TRIM7 binding.** (A) Sequence and domain organization of TRIM7 (grey) and Glycogenin1 (pale orange). TRIM7 is also depicted as a cartoon (circle – RING, rectangle – B-Box, line – Coiled-coil, cut-out circle – PRYSPRY) used throughout this paper. Highlighted are sequences determining TRIM7 binding. (B) ITC binding experiments with sequential truncations of rbGYG1 (shown above each titration) titrated into human hisTRIM7-PRYSPRY. (C) Cartoon overview of the crystal structure of hisTRIM7-PRYSPRY (grey) with the GYG1 peptide (orange) on left (PDB accession 7OW2). Comparison with TRIM21:Fc structure (2IWG, PRYSPRY wheat, Fc magenta) on the right.

**Figure 2. TRIM7 binds diverse substrates using a C-terminal helix- $\Phi$ Q motif.** (A) MNV1 polyprotein (pale blue) and the relevant proteins in darker shade (NS3 and NS6), CVB3 polyprotein in pale green and the relevant 2C protein in a darker shade. (B) Main peptide sequences used in the binding and structural experiments. Outlined are the sequences synthesized whilst the shaded residues are those resolved in the crystal structures. Color coding is maintained throughout the figure. (C) hisTRIM7-PRYSPRY:Peptide complex structures superposed. Shows PRYSPRY as transparent surface representation with a few key residues in stick. Peptides are colour coded as described. PDB accession codes are 7OW2, 7OVX, 8A5L and 8A5M). (D) Detail of the PRYSPRY pocket with the recognition motif bound. Several key residues are highlighted. Dashes indicate charged or H-bonding between the peptide and the PRYSPRY residues. Underlined residues are essential for binding (see Figure S3). (E) Peptide substitutions based on the TIEALFQ peptide and possible polyprotein processing ends. Binding experiments with the minimal LQ motif, sequence is shown and the derived KD from ITC titrations. No binding\* denotes where the peptide was only tested using nanoDSF. (F) Thermal denaturation data of hTRIM7-PRYSPRY derived using the Prometheus nanoDSF. Shows the Tm of the protein in the presence of peptide or DMSO. Peptides which bind stabilize the protein. (G&H) Avidity enhancement of binding affinity with hisMBP-TRIM7-CC-PRYSPRY. (G) Shows the AlphaFold prediction of the TRIM7 dimer (grey and wheat) aligned with the crystal structure (pale blue and orange). (H) The full length GYG1 protein (isoform GN1) shows clear 1:1 binding between the protein dimers, whilst no difference in affinity is observed when the peptide is the substrate.

**Figure 3. TRIM7 co-localises with helix-ΦQ containing substrates inside cells and degrades them. (A-E)** Schematic representation of *in-vitro* ubiquitination experiments. **(A)** TRIM7-RING (grey circle) was mixed with combinations of Ubiquitin (Ub, blue circle), Ube2N/Ube2V2 (purple semi-circle) and Ube2W (green teardrop) as shown and the reactions followed by immunoblotting **(C)** with an anti-TRIM7 antibody. **(B)** E2 discharge experiment: Ube2N~Ub complex was incubated with TRIM7-RING and the reaction followed over time as indicated in **(D)**. Blots were probed with anti-ubiquitin antibody. A single asterisk denotes the charged Ube2N~Ub, whereas a double asterisk denotes the uncharged Ube2N. **(E)** Densitometry quantification of band intensities from 3D were plotted to show the kinetics of E2-Ub discharge. Error bars in all graphs depict the mean +/- SEM. All data represents at least three independent replicates. **(F)** Western blots from cells overexpressing indicated constructs of epitope tagged TRIM7 (probed with anti-HA antibody). Ubiquitin-laddering is lost when the RING domain is deleted. **(G)** Schematic overview of the experiments presented in the figure H. EGFP-GYG1 is represented as a green-brown shape. TRIM7 is shown as usual but with N-terminal mCherry (magenta circle). Plasmids were co-expressed and the fluorescence monitored using live imaging and the protein levels quantified using either the fluorescence intensity or using cell lysates. **(H)** Live-cell microscopy of U2OS cells expressing mCherry-TRIM7 and EGFP-GYG1 constructs. Left column shows the EGFP signal (green), middle column shows the mCherry signal (magenta) and the right column shows the false-colored merged image (EGFP – green; mCherry – magenta; merge – white). The scale is the same in all images and the bar represents 10 μm. Rows represent different conditions: Top is both WT sequences. Middle has a Q333A mutation in the EGFP-GYG1 construct. Bottom has the R385A mutation in the mCh-TRIM7 construct. **(I)** Line profile analysis (ImageJ) of the fluorescent signal. Green trace shows the EGFP signal whilst the magenta trace shows the mCherry signal. The line used in the analysis is shown on the merged signal images. **(J)** Fluorescence based quantification (using the InCuCyte) of EGFP-GYG1 protein levels, graph shows the total integrated intensity of the EGFP signal divided by the EGFP area. **(K&L)** Protein quantification and blots using cell lysates and capillary-based Western Blot (Jess). Values were normalized to loading control (actin) and the fraction of cells transfected (see methods).

**Figure 4. TRIM7 restriction of MNV1 and CVB3 infection is driven by helix-ΦQ binding. (A-C)** Co-transfection of TRIM constructs and reporter plasmids. Overexpression of TRIM7 induces strong signalling by AP-1 and NF-κB that is dependent on the RING domain. Values are normalized to cells transfected with the empty vector. **(D)** Overexpression of TRIM7 induces signalling as measured by qPCR, values are normalized to actin. **(E)** Point mutation that prevents binding to targets does not impact signalling. **(F&G)** Schematic overview of the experiments shown in H and I. Lentivirus generation and stable transfection of HeLa-CD300lf cells (F), with the expression confirmed by western blotting (Figure S5). Cells were infected with recombinant CVB3 virus producing EGFP in host cells or MNV1 (G). **(H)** Quantification of CVB3 infection by measuring the fraction of EGFP-expressing cells. Data shown are from three independent experiments. **(I)** Quantification of MNV1 replication by TCID<sub>50</sub> following infection of TRIM7-expressing cells. Virions from lysed cells were titrated onto susceptible BV-2 cells. Data shown is a representative result of three independent experiments. Error bars show the standard deviation. Non-parametric ANOVA was used for statistical analysis and significant differences indicated (P < 0.05 (\*), p < 0.0005 (\*\*\*), p < 0.0001 (\*\*\*\*)).

**Figure S1: ITC traces of GYG1 binding to the TRIM7 PRYSPRY domain.** Traces for hsGYG1:hTRIM7 binding **(A)**, rbGYG1:mTRIM7 binding **(B)**, mGYG1:mTRIM7 binding **(C)**, rGYG1<sub>1-246</sub>:hTRIM7 binding **(D)**, rGYG1<sub>1-299</sub>:hTRIM7 binding **(E)**, GYG1<sub>339-350</sub>:hTRIM7 binding **(F)**, RACO1<sub>229-237</sub>:hTRIM7 binding **(G)**, 2BC<sub>1434-1440</sub>:hTRIM7 binding **(H)**, NS6<sub>1172-1178</sub>:hTRIM7 binding **(I)**, NS3<sub>700-706</sub>:hTRIM7 binding **(J)**, NS3<sub>700-706</sub>:hTRIM7-R385A binding **(K)**, Ac-LLQ:hTRIM7 binding **(L)**, Ac-LQ:hTRIM7 binding **(M)**, AAAAAAA:hTRIM7 binding **(N)**, AAAAAALQ:hTRIM7 binding **(O)**, LQ:hTRIM7 binding **(P)**. Fitted values and more experimental information is shown in Table S2.

**Figure S2: Crystal structures of TRIM7:peptide complexes.** (A) TRIM7 PRYSPRY in surface representation, with the GYG1 peptide in stick (orange). Additionally, a sequence of residues from the PRYSPRY is shown of all four aligned structures in stick (relevant colours for each peptide complex). Below, an example 2FO-FC map is shown for the structure. (B-D) Structures of (B) TRIM7:RACO1 (yellow), (C) TRIM7:2BC (green) and (D) TRIM7:NS6 (blue) with example densities shown below. (E) Previously published apo structure with bound malate (turquoise) in the pocket (6UMB). (F) TRIM7:NS3 (accession 8A8X) overview shows TRIM7 (grey cartoon) in complex with NS3 (lilac, stick).

**Figure S3: ITC binding traces.** **Main:** Peptides GYG1, RACO-1, 2BC and NS6 titrated against indicated mutant hisTRIM7-PRYSPRY. **Right middle:** PRYSPRY against 2BC peptide mutant T323A and the Q1440A mutation which abolishes binding. **Bottom right:** ITC binding analysis of key PRYSPRY residues (Alanine substitutions). NT = not tested. \*potential weak binding with  $K_D$  estimated  $>100 \mu\text{M}$ . Fitted values and more experimental information is shown in Table S2.

**Figure S4: Isoforms of GYG1 used in the study.** Differences between rabbit GYG1 (top), human GYG1 (middle) and the GN1 isoform of human GYG1 (bottom).

**Figure S5: Stable cell line validation.** Western blot from cells transduced with TRIM7 expressing lentivirus. Probed with a mouse anti-TRIM7 (1:250) antibody generated in-house.

**Figure S6: SARS-CoV-2 infection is not restricted by TRIM7.** (A) SARS-CoV-2 proteins and their C-terminus dipeptide sequence. (B) Cells over-expressing TRIM7 constructs described in Figure 4 were further transduced with lentivirus encoding human ACE2 to make the cells permissive for SARS-CoV2 infection. Cells were infected and viral load quantified using RT-qPCR. (C) Viral genome copies normalized to 18S. No significant differences were detected.

**Figure S7: Phylogenetic trees for GYG1 and TRIM7.** Maximum-likelihood phylogenetic tree for GYG1 and TRIM7 using sequences from Ensembl v 106 (Howe et al., 2021). Branch lengths correspond to the mean number of amino-acid substitutions per site.

**Table S1: Data collection and refinement statistics.** TRIM7 PRYSPRY complexes with various ligands. Statistics for both data integration and model refinement are given.

**Table S2 – ITC data.** Concentration for proteins and peptides is given as monomer. \* indicates where N was fixed in analysis. \*\*Concentration of GYG1 (and MBP-T7-CC-PS) dimer was used in the analysis. NB = no binding.

## Acknowledgements

This work was supported by the MRC (UK; U105181010), a Wellcome Trust Investigator Award (200594/Z/16/Z) and a Wellcome Trust Collaborator Award (214344/A/18/Z). IG is a Wellcome senior fellow and supported by the Wellcome Trust (207498/Z/17/Z). We thank past and present members of the James lab, including David Jacques for help with data collection, and the Biophysics Facility at MRC-LMB.

## Competing Interests

The authors declare that they have no competing interests.

## Author Contributions

Study was conceived by LCJ. Manuscript was written by LCJ and JL. Experiments and analysis were performed by all authors.

## Methods

### Proteins

Trim7 PRYSPRY constructs and GYG constructs with an N terminal hexahistidine tag were expressed in *E. coli* (C41) and purified using Nickel affinity chromatography and Size Exclusion Chromatography (SEC). Briefly, cells were grown in 2XTY (supplemented with 0.5% glucose, 2 mM MgSO<sub>4</sub> and appropriate antibiotics) at 37 °C for 2-3 hours (OD<sub>600</sub> around 0.6-1) after which they were induced with 1 mM IPTG and incubated at 18 °C overnight. Cells were pelleted with a Sorvall SLC-6000 compatible centrifuge at 4500 × *g* for 25 minutes and the pellet frozen until processed. The pellet was resuspended in lysis buffer (50 mM Tris pH 8, 1 M NaCl, 10% v/v BugBuster (Novagen), 10 mM imidazole, 2 mM DTT and 1 × cOmplete protease inhibitors (Roche) and sonicated for 15 minutes total time (10s on/20s off) at 70% amplitude. Soluble fraction was recovered by centrifugation at 40 000 × *g* in a JLA25.50 rotor and put through a gravity flow column with 5 ml of NiNTA Agarose (Qiagen). Bound fraction was washed in Buffer B (300 mM NaCl, 50 mM Tris pH 8, 10 mM imidazole and 1 mM DTT) and eluted with Buffer E (300 mM NaCl, 50 mM Tris pH 8, 400 mM imidazole and 1 mM DTT). Fractions containing the protein were pooled, filtered and separated by SEC using HiLoad 26/600 Superdex 75 pg column (Cytiva) in 150 mM NaCl, 50 mM Tris pH 8 and 1 mM DTT. Full-length GYG proteins were separated using an equivalent 200pg column. The appropriate fractions were pooled and concentrated to 10-15 mg/ml.

MBP-Trim7-CCPS was expressed and purified as described above but with the following adjustments; after elution from NiNTA agarose, the fractions were pooled and loaded onto an MBP-Trap (5ml) column (300 mM NaCl, 50 mM Tris pH 8, 1 mM DTT) washed with the same buffer and then eluted with buffer supplemented with 10 mM Maltose. The peak fractions were then separated by SEC using HiLoad 26/600 Superdex 200 pg column in 300 mM NaCl, 50 mM Tris pH 8, 10% w/v glycerol and 1 mM DTT. The appropriate fractions were pooled and concentrated to 20 mg/ml.

TRIM7-RING and TRIM7-RING-Box were expressed in *E. coli* C41 cells as GST-TEV fusion protein. Cleared cell lysates were prepared by sonication in 50 mM Tris at pH 8 (pH 9 for RING-Box), 150 mM NaCl, 2 mM DTT with the addition of 20% (vol/vol) BugBuster and cOmplete protease inhibitors, followed by centrifugation 16,000 × *g* for 30 min. Lysates were loaded onto GST beads and washed with lysis buffer, then cleaved with TEV protease overnight at 4 °C. Cleaved proteins were concentrated and separated using a HiLoad 26/600 Superdex 75 size exclusion column. The peak fractions were pooled, concentrated, and frozen in aliquots at -80 °C. Ube1, Ube2N, Ube2V2, Ube2W were produced as previously described (Fletcher et al., 2015).

### Constructs and cloning

Trim7-PRYSPRY (both mouse and human) were ordered as synthetic genes encoding the residues 342-511 of TRIM7 and cloned into a double digested pOPTH (introduces uncleavable MAHHHHHHM sequence at the N terminus) expression vector (KpnI, NdeI). MBP-hTRIM7-CC-PS was cloned by amplifying the hTrim7-PRYSPRY sequence and Gibson assembly with a synthetic gene fragment containing the CC sequence (residues 165-341) into a double digested pOPTM (introduces hisMBP-TEVsite at the N terminus) expression vector (KpnI, NdeI). TRIM7-RING (residues 1-123) and TRIM7-RING-BOX (residues 1-168) constructs were cloned by PCR amplification from codon optimised (*E. coli*)

synthetic DNA and Gibson assembly into double digested (NdeI, HindIII) pOPTG expression vector (introduces GST-TEVsite at the N terminus).

pSMPP-2xHA-Trim7 constructs were generated from a full-length codon optimised 2xHA-TRIM7 sequence (GeneArt). Relevant fragments (FL,  $\Delta$ PRYSPRY[1-341],  $\Delta$ RING[128-511]) were PCR amplified and cloned into BamHI linearised pSMPPv1 using Gibson assembly. pSMPP-Trim7 constructs were generated using DNA strings (GeneArt) designed for Gibson assembly into double digested (NotI, BamHI) pSMPP vector. pmCherry-Trim7 constructs were cloned from pSMPP-2XHA-Trim7 constructs using Q5 PCR amplification and Gibson assembly into double digested (XhoI, KpnI) pmCherry-C1 plasmid vector.

pmEGFP-GYG1 plasmid was generated by restriction cloning of a synthesized gene fragment encoding the hsgYG1-GN1 sequence into pmEGFP-C1 plasmid vector (BsrGI, EcoRI). hYG1-GN1 was generated by Q5 PCR amplification of the sequence from pmEGFP-GYG1 and Gibson assembled into a double digested pOPTH (introduces uncleavable MAHHHHHH sequence at the N terminus) plasmid vector (KpnI, NdeI). The rest of the GYG1 protein constructs were ordered as synthetic genes and cloned into double digested pOPTH (KpnI, HindIII).

All site directed mutagenesis was performed Q5 PCR kit following a protocol by Liu and Naismith (2008), apart from mutagenesis of pSMPP-TRIM7-R385A which was cloned by Gibson mutagenesis following manufacturer's instructions (NEB).

## Cell culture

HEK293T, BV-2 and HeLa-CD300lf cells were grown in Dulbecco's modified Eagle's medium (DMEM) supplemented with 10% FBS, 2 mM L-glutamine, 100 U/ml penicillin, and 100 mg/ml streptomycin (GIBCO) at 37°C with 5% CO<sub>2</sub>. U2OS cells were grown in McCoy-5a medium supplemented with 10% FBS, 1XGlutaMAX, 100 U/ml penicillin, and 100 mg/ml streptomycin.

## NF- $\kappa$ B and AP-1 signalling experiments

HEK 293T cells were seeded at 1E5 cells per well in 24 well plates 24 hr before transfection. Each well was transfected with the indicated amounts of pEXN-HA-TRIM cDNA, with 10 ng pGL4.32[*luc2P*/NF- $\kappa$ B-RE/Hygro] (NF- $\kappa$ B response element-dependent firefly luciferase) or pGL4 [*luc2P*/AP-1-RE/Hygro] and 5 ng pRL-TK using the Dual Luciferase Reporter Assay (Promega). 24 hours post transfection, cells were lysed in Passive Lysis Buffer and sequential firefly and renilla luminescence measured (BMG Pherastar plate reader), according to manufacturer's instructions (Promega). Firefly luciferase luminescence was normalised to *Renillia* luciferase luminescence, and these values normalised to those of empty vector transfected cells.

## qPCR signalling experiments

HEK293T cells were seeded at 2.5E5 cells per well in a 6-well plate. Next day the cells were transfected with 250ng of either pEXN-HA-TRIM7 or empty pEXN-HA vector and harvest cells after 8 hours. RNA was extracted from cells using the RNeasy mini kit (Qiagen) and cDNA produced from 1  $\mu$ g RNA using oligo dT and Superscript RT. Gene expression was monitored by TaqMan Gene Expression Assays (Applied Biosystems) on a StepOnePlus Real Time PCR System (Life Technologies). Gene expression assays were from Applied Biosystems: ACTB (Hs01060665\_g1), CXCL10 (Hs01124251\_g1). Relative expression was quantified using the  $2^{-\Delta\Delta Ct}$  method.

## Stable cell line generation

To generate TRIM7 lentiviruses pSMPP-hTRIM7 constructs were co-transfected into HEK293T cells with pMDG2 and pCRV-GagPol plasmids using FuGENE6 (Promega) reagent and incubated for 3 days. Supernatants were harvested by filtration and used for transduction of HeLa cells expressing the mouse CD300lf (Jahun et al., 2021) as previously described (Fan et al., 2021). Briefly, 2.5E5 cells were infected with the appropriate lentivirus in a 6-well plate in DMEM supplemented with 3% FBS, 20 mM HEPES, and 4 µg/ml Polybrene, and spinoculated at 1000 × *g* and 25°C for 45 min. The cells were then incubated at 37°C for 48 hours. Antibiotic selection was carried out with 2 µg puromycin until all untransduced control cells were dead.

### **CVB3 experiments**

For production of Coxsackievirus, plasmid encoding for strain pH3 with an eGFP (eGFP-CVB3) (kind gift from Professor Charles Rice) was transfected into HEK293T cells using PEI. After 48 hours stock was harvested by 3 cycles of freeze-thawing and centrifugation to remove the debris. Collected stock (P0) was used to generate working stock (P1) by infecting fresh plate for HEK293T cells and harvesting as above. Virus titre was assessed by TCID<sub>50</sub> using HeLa cells. For infection experiments, HeLa-CD300lf stably expressing different TRIM7 constructs were seeded onto 24-well plates 24 hours prior infection. Cells were infected at MOI of 0.2 and infection levels determined by measuring eGFP fluorescence after 12 hours on the incuCyte.

### **MNV1 experiments**

HeLa-CD300lf-TRIM7 cells suspended in DMEM supplemented with 10% FBS were incubated with the virus on an end-to-end rotor at 37°C for 1 hour. The cells were then washed twice in DMEM to remove unbound virus and then incubated at 37°C for the duration of the infection. The plate (both cells and supernatants) was frozen at -80°C at 24 hours post-infection and TCID<sub>50</sub> assays were subsequently carried out in BV2 cells as previously described (Hwang et al., 2014).

### **SARS-CoV2 experiments**

HeLa cells expressing versions of TRIM7 were transduced with ACE2 lentivirus and selected with 10µg/ml of Blasticidin. After confirming ACE2 expression cells were seeded into 96-well plates at density of 1.5E4 day prior infection. For infections we used isolate of omicron variant BA.1 (EPI\_ISL\_7886688) that was a gift from Ravi Gupta (University of Cambridge). Media containing 2% FBS and virus at MOI = 0.2 PFU/cell was added to wells and incubated for 18h. Cells were freeze-thawed and then lysed with buffer containing 0.25% Triton X-100, 50 mM KCl, 100 mM Tris-HCl pH 7.4, glycerol 40% and RNasecure (1/100) for 5 minutes. Infectious virus was then inactivated at 95°C for 5 min and samples processed for RT-qPCR as described previously (Albecka et al., 2021). We used Luna Universal Probe One-Step kit following manufacturer's recommendations. Primer/probe for genomic viral RNA were CDC-N1. Primer probe for 18S control were described previously (Ashraf et al., 2006). SARS-CoV-2\_N\_Positive control RNA was used as standard for the viral genomic N reactions. For 18S standard, DNA was synthesized and kindly gifted by Jordan Clarks and James Stewart (University of Liverpool). Final concentrations of 500 nM for each primer and 125 nM for the probe were used. RT-qPCRs were run on ABI StepOnePlus PCR System with following program: 55°C for 10 min, 95°C for 1 min and then 40 cycles of 95°C denaturation for 10 s and 60°C extension for 30 s. RNA copy numbers were obtained from standards and then genomic copies of N normalized to 1010 copies of 18S.

### **Co-localisation and degradation experiment**

U2OS cells were seeded into 8-well  $\mu$ -slide (ibidi, polymer) for co-localization or into standard tissue culture 24-well plates for bulk fluorescence quantification and protein quantification. For former 2-3E4 cells were seeded and 5E4 cells were seeded in the latter. Next day, cells were co-transfected by a 1:1 mixture of the relevant plasmids using FuGENE6 and placed in the incuCyte (Sartorius) for live imaging. After 18-20 hours of transfections the cells were harvested and the cell pellets processed as described below. To quantify the degradation of the EGFP-GYG1 using bulk fluorescence by incuCyte, the total integrated intensity in each condition was divided by the green fluorescence area to account for different transfection efficiencies. Co-localisation experiment was imaged using live-cell imaging with the LUMASCOPE LS720 (Etaluma). Cells expressing low levels of each plasmid were selected for analysis to avoid overexpression artefacts and aggregated proteins. Images were processed in ImageJ and data plotted in PRISM (GraphPad).

### **Protein quantification using Capillary Based Western Blot (Jess)**

Cells were lysed in 40  $\mu$ l RIPA buffer supplemented with 1  $\times$  cOmplete protease inhibitors (Roche) and the soluble protein recovered by centrifugation (40 min at 21k  $\times$  g). 30  $\mu$ l of the lysate was diluted with 90  $\mu$ l 0.1  $\times$  Sample Buffer 2 and further processed according to manufacturer's instructions. Jess instrument was used to analyse the samples (Protein Simple). Actin was used as the loading control (MAB8929, 1:1000) and detected with anti-mouse HRP. mCh-Trim7 was detected with rabbit polyclonal anti-mCherry (ab167453, 1:200) and EGFP-GYG1 was detected with rabbit polyclonal anti-GFP (NB600-303, 1:1000) both detected with anti-rabbit NIR secondary antibody. Protein levels were normalised to actin and to the fraction of cells transfected (determined with the incuCyte as the fraction of cells with detectable green fluorescence).

### **In-vitro ubiquitination experiment**

In vitro ubiquitination reactions were carried out in 1 $\times$  ubiquitination buffer (50 mM Tris-HCl, pH 7.4, 2.5 mM MgCl<sub>2</sub>, 0.5 mM DTT) with the addition of 2 mM ATP, 0.5  $\mu$ M His-E1, 1  $\mu$ M Ube2W, Ube2N/Ube2V2, 8  $\mu$ g ubiquitin (Ub) and 400 ng TRIM7-RING. Reaction mixtures were incubated at 37  $^{\circ}$ C for 1–4 hours, quenched by addition of LDS sample buffer and boiling at 95  $^{\circ}$ C for 5 min. Samples were resolved by LDS-PAGE and detected by immunoblot with TRIM7 or anti-Ub-HRP (Santa Cruz, sc8017-HRP P4D1, 1:1000) antibodies.

### **Ubiquitin Discharge Assay**

To prevent auto-ubiquitination, lysine 92 of Ube2N was replaced with arginine (McKenna et al., 2001). Ube2NK92R was loaded with ubiquitin by mixing 40  $\mu$ M of the E2 with 1  $\mu$ M Ube1, 0.37 mM Ub and 3 mM ATP in 50 mM HEPES pH 7.5, 150 mM NaCl, 20 mM MgCl<sub>2</sub>, and incubating the reaction at 37 $^{\circ}$ C for 30 min. The reaction was transferred to ice and used immediately. To observe E3 mediated discharge of ubiquitin, 2  $\mu$ M ubiquitin loaded E2 was mixed with 1.5  $\mu$ M TRIM7-RING in 50 mM HEPES pH 7.5, 150 mM NaCl, 20 mM MgCl<sub>2</sub>, 50 mM L-lysine, 2.5  $\mu$ M Ube2V2. Samples were taken at the time points indicated in the text and mixed immediately with LDS sample buffer at 4 $^{\circ}$ C. The samples were boiled for exactly 20 seconds, resolved by LDS-PAGE and observed by immunoblot using anti-Ube2N (Bio-Rad, AHP974, 1:1000) and detected by near-infrared detection (Odyssey, LI-COR).

### **Western blotting**

Stable cell lines were confirmed for overexpression of TRIM7 by western blot. Cells were lysed in RIPA buffer. Lysates were separated on a precast SDS-PAGE gel (NuPAGE, 4-12%) transferred onto

nitrocellulose membranes, and blotted for GAPDH (Ambion, AM4300; 1:20,000), and TRIM7 (generated in house,  $\alpha$ Trim7; 1:250)

### **Antibody generation and animal handling**

C57BL/6 wild-type mice were obtained from Jackson Laboratories and bred in LMB ARES facility under SPF condition. Thirteen-week-old-mice were used for immunisation experiment, which was conducted in accordance with the moderate severity limit protocol 7 and Home Office Animals (Scientific Procedures) Act (1986). All animal work was licensed under the UK Animals (Scientific Procedures) Act, 1986 and approved by the Medical Research Council Animal Welfare and Ethical Review Body. Mice (n=12) were immunised subcutaneously (s.c) with 100  $\mu$ g TRIM7-Ring-Box protein in PBS mixed with complete Freund's adjuvant, 200  $\mu$ l of emulsion per animal. Mice received 3 rounds of s.c boosting with 50  $\mu$ g protein mixed with incomplete Freund's adjuvant. Boosting was done at days 21, 42 and 79. Tail bleeds for ELISA analyses were collected at days 31, 58. Mice were sacrificed at day 93 and intracardiac blood was collected.

### **ELISA**

96 well plate (Nunc) was coated overnight with 1  $\mu$ g/ml of TRIM7-RING-Box. Plate was blocked with 2% Marvell in PBS, 0.05% Tween 20 (MPBST) and incubated with diluted mouse sera. Bound antibodies were detected with goat anti-mouse IgG-GRP (Jackson Immunoresearch, 115-035-071)

### **Peptides**

The peptides DNIKKKLDTYLQ and NLGLSMLLQ were ordered from St John's Innovation Centre, Cambridge, UK. Peptides DNIKKKLDTYLQ, TIEALFQ, AIEALFQ, TIEALFA, TIEALAQ, TIEALRQ, TIEALVQ, TIEALFE, TIEALEQ, LQ, LLQ, Ac-LLQ, AAAAAAA, AAAAAALQ were synthesised by DesignerBioscience, dissolved in DMSO to 50-200 mM and stored at -80 °C. Peptides HDDFGLQ, LEALEFQ were synthesised by GenScript and dissolved in DMSO to 50 mM and stored at -80 °C

### **Isothermal titration calorimetry (ITC)**

Titration were performed using the MicroCal iTC200 and MicroCal Auto-iTC200 instruments. Binding assays were carried out in 150 mM NaCl, 50 mM Tris pH 8, 1 mM DTT and 0-1% v/v DMSO. Generally, 13-20 injections were carried out with a DP of 6  $\mu$ cal/s, 750 RPM, 20-25 °C, 150-180s spacing and 5-6s injection times of 2.5-3  $\mu$ L. Titrations were performed with protein and peptide in cell and syringe interchangeably. Generally, TRIM7 in the cell was kept at 20  $\mu$ M with peptides diluted to 400  $\mu$ M and up to 2 mM for dipeptides. See Table S2 for details. Control titrations of titrant into buffer were carried where appropriate. Data were analysed using MicroCal PEAQ-ITC analysis software, using one site model to fit the data. For low c-value experiments (such as the LQ titration) the N was fixed to 1. For experiments with MBP-T7CCPS the buffer was 165 mM NaCl, 50 mM Tris pH 8, 1 mM DTT, 0.5 % w/v glycerol and 0-0.8% v/v DMSO. For experiments with rbGYG, mGYG and mTrim7-PRYSPRY the protein samples were dialysed against 50 mM phosphate buffer, pH 6.5 and 1 mM DTT. ITC experiments were conducted on MicroCal ITC 200 at 15°C or an AutoITC and analyzed using standard one-state model within MicroCal instrument software.

### **Differential scanning fluorimetry**

Thermal stabilisation assays were performed using the NanoTemper Prometheus NT48 instrument. All experiments were performed in 150 mM NaCl, 50 mM Tris pH 8, 1 mM DTT and 1% v/v DMSO unless otherwise noted. Trim7 PRYSPRY was used at 10  $\mu$ M and peptides at 90  $\mu$ M. Samples were



heated at 2°C/min from 15 to 95°C. Data were analysed using the NanoTemper Prometheus Control Software and the first derivative of the melt curves used to define the  $T_m$  for the apo and complexed samples.

### **Crystallography**

TRIM7 PRYSPRY protein was dialysed against 20 mM HEPES, 50 mM NaCl, 1mM DTT, pH 8.0) and concentrated to 15 mg/ml. 4 mM peptide was added and the complex crystallised in 0.2 M KCSN, 15 % PEG 4000, 0.1 M NaOAc, pH 5.5 for GYG1 (NH<sub>2</sub>-DNIKRLDTYLQ -COOH, 100 mM in DMSO), for RACO-1 (NH<sub>2</sub>-NLGLSMLLQ -COOH, 50 mM in DMSO) in 1.5 M NaPO<sub>4</sub>H<sub>2</sub> and 1 M Sodium Citrate pH 5.5. For 2BC, Trim7 PRYSPRY at 13.15 mg/ml in 150 mM NaCl, 50 mM Tris pH 8 and 1 mM DTT was mixed 100:1 with the 2BC peptide (NH<sub>2</sub>-TIEALFQ-COOH, 100 mM in DMSO) and crystallised in 1 M Sodium Potassium Tartrate, 0.1 M HEPES pH 6.8. For NS6 peptide (NH<sub>2</sub>-LEALEFQ -COOH, 50 mM in DMSO) the protein was mixed 50:1 and co-crystallised in 1M Na/K Phosphate pH 5. Crystals were cryoprotected with reservoir solution containing 20-30% v/v glycerol. Data for GYG1 was collected on an in-house FR-E SuperBright high-brilliance rotating anode linked to an automated crystal mounting system (ACTOR; Rigaku) and processed with CCP4i (Collaborative Computational Project, 1994) package as follows: Data were indexed in iMOSFILM, point group was determined in POINTLESS and scaled in SCALA. Molecular replacement was performed with PHASER (McCoy et al., 2007) using the TRIM21 PRYSPRY model 2IWG. After the first iteration, further structures were solved using the Trim7 model from the GYG structure. The MR model was refined with COOT (Emsley et al., 2010) and REFMAC5 (Murshudov et al., 2011). Data for RACO-1 was collected at the ESRF on beamline ID23 and processed as for GYG1. Data for 2BC and NS6 were collected at the DLS on beamline i24 and i04 respectively, processed using the FASTDP (Winter & McAuley, 2011) and Xia2dials (Winter et al., 2018) pipeline and processed as described.

### **Phylogenetic analysis**

Coding sequences for TRIM7 and GYG1 were obtained from Ensembl v. 106 (Howe et al., 2021). Multiple sequence alignments were constructed with Muscle v. 3.8.31 with default arguments (Edgar, 2004). Phylogenetic trees were reconstructed using raxml v. 8.2.12 (with “-f a -m PROTCATLGX -# 100” arguments)(Stamatakis, 2014).

## References.

- Albecka, A., Clift, D., Vaysburd, M., Rhinesmith, T., Caddy, S. L., Favara, D. M., Baxendale, H. E., & James, L. C. (2021, Sep 1). A functional assay for serum detection of antibodies against SARS-CoV-2 nucleoprotein. *The EMBO journal*, *40*(17), e108588. <https://doi.org/10.15252/embj.2021108588>
- Ashraf, N., Zino, S., Macintyre, A., Kingsmore, D., Payne, A. P., George, W. D., & Shiels, P. G. (2006, Oct 23). Altered sirtuin expression is associated with node-positive breast cancer. *British journal of cancer*, *95*(8), 1056-1061. <https://doi.org/10.1038/sj.bjc.6603384>
- Bachmair, A., Finley, D., & Varshavsky, A. (1986, Oct 10). In vivo half-life of a protein is a function of its amino-terminal residue. *Science*, *234*(4773), 179-186. <https://doi.org/10.1126/science.3018930>
- Bharaj, P., Atkins, C., Luthra, P., Giraldo, M. I., Dawes, B. E., Miorin, L., Johnson, J. R., Krogan, N. J., Basler, C. F., Freiberg, A. N., & Rajsbaum, R. (2017, Sep 15). The Host E3-Ubiquitin Ligase TRIM6 Ubiquitinates the Ebola Virus VP35 Protein and Promotes Virus Replication. *Journal of virology*, *91*(18). <https://doi.org/10.1128/JVI.00833-17>
- Cadena, C., Ahmad, S., Xavier, A., Willemsen, J., Park, S., Park, J. W., Oh, S. W., Fujita, T., Hou, F., Binder, M., & Hur, S. (2019, May 16). Ubiquitin-Dependent and -Independent Roles of E3 Ligase RIPLET in Innate Immunity. *Cell*, *177*(5), 1187-1200 e1116. <https://doi.org/10.1016/j.cell.2019.03.017>
- Chakraborty, A., Diefenbacher, M. E., Mylona, A., Kassel, O., & Behrens, A. (2015). The E3 ubiquitin ligase Trim7 mediates c-Jun/AP-1 activation by Ras signalling [Research Support, Non-U.S. Gov't]. *Nature communications*, *6*, 6782. <https://doi.org/10.1038/ncomms7782>
- Collaborative Computational Project, N. (1994, Sep 01). The CCP4 suite: programs for protein crystallography. *Acta crystallographica. Section D, Biological crystallography*, *50*(Pt 5), 760-763. <https://doi.org/10.1107/S0907444994003112>
- Di Pietro, A., Kajaste-Rudnitski, A., Oteiza, A., Nicora, L., Towers, G. J., Mechti, N., & Vicenzi, E. (2013, Apr). TRIM22 inhibits influenza A virus infection by targeting the viral nucleoprotein for degradation. *Journal of virology*, *87*(8), 4523-4533. <https://doi.org/10.1128/JVI.02548-12>
- Edgar, R. C. (2004). MUSCLE: multiple sequence alignment with high accuracy and high throughput. *Nucleic acids research*, *32*(5), 1792-1797. <https://doi.org/10.1093/nar/gkh340>
- Emsley, P., Lohkamp, B., Scott, W. G., & Cowtan, K. (2010, Apr). Features and development of Coot. *Acta Crystallogr D Biol Crystallogr*, *66*(Pt 4), 486-501. <https://doi.org/10.1107/S0907444910007493>

- Fan, W., Mar, K. B., Sari, L., Gaszek, I. K., Cheng, Q., Evers, B. M., Shelton, J. M., Wight-Carter, M., Siegwart, D. J., Lin, M. M., & Schoggins, J. W. (2021, Jun 24). TRIM7 inhibits enterovirus replication and promotes emergence of a viral variant with increased pathogenicity. *Cell*, *184*(13), 3410-3425 e3417. <https://doi.org/10.1016/j.cell.2021.04.047>
- Fletcher, A. J., Christensen, D. E., Nelson, C., Tan, C. P., Schaller, T., Lehner, P. J., Sundquist, W. I., & Towers, G. J. (2015, Aug 4). TRIM5alpha requires Ube2W to anchor Lys63-linked ubiquitin chains and restrict reverse transcription. *The EMBO journal*, *34*(15), 2078-2095. <https://doi.org/10.15252/embj.201490361>
- Fletcher, A. J., Vaysburd, M., Maslen, S., Zeng, J., Skehel, J. M., Towers, G. J., & James, L. C. (2018, Dec 12). Trivalent RING Assembly on Retroviral Capsids Activates TRIM5 Ubiquitination and Innate Immune Signaling. *Cell Host Microbe*, *24*(6), 761-775 e766. <https://doi.org/10.1016/j.chom.2018.10.007>
- Giraldo, M. I., Xia, H., Aguilera-Aguirre, L., Hage, A., van Tol, S., Shan, C., Xie, X., Sturdevant, G. L., Robertson, S. J., McNally, K. L., Meade-White, K., Azar, S. R., Rossi, S. L., Maury, W., Woodson, M., Ramage, H., Johnson, J. R., Krogan, N. J., Morais, M. C., Best, S. M., Shi, P. Y., & Rajsbaum, R. (2020, Sep). Envelope protein ubiquitination drives entry and pathogenesis of Zika virus. *Nature*, *585*(7825), 414-419. <https://doi.org/10.1038/s41586-020-2457-8>
- Howe, K. L., Achuthan, P., Allen, J., Allen, J., Alvarez-Jarreta, J., Amode, M. R., Armean, I. M., Azov, A. G., Bennett, R., Bhai, J., Billis, K., Boddu, S., Charkhchi, M., Cummins, C., Da Rin Fioretto, L., Davidson, C., Dodiya, K., El Houdaigui, B., Fatima, R., Gall, A., Garcia Giron, C., Grego, T., Guijarro-Clarke, C., Haggerty, L., Hemrom, A., Hourlier, T., Izuogu, O. G., Juettemann, T., Kaikala, V., Kay, M., Lavidas, I., Le, T., Lemos, D., Gonzalez Martinez, J., Marugan, J. C., Maurel, T., McMahon, A. C., Mohanan, S., Moore, B., Muffato, M., Oheh, D. N., Paraschas, D., Parker, A., Parton, A., Prosovetskaia, I., Sakthivel, M. P., Salam, A. I. A., Schmitt, B. M., Schuilenburg, H., Sheppard, D., Steed, E., Szpak, M., Szuba, M., Taylor, K., Thormann, A., Threadgold, G., Walts, B., Winterbottom, A., Chakiachvili, M., Chaubal, A., De Silva, N., Flint, B., Frankish, A., Hunt, S. E., GR, I. I., Langridge, N., Loveland, J. E., Martin, F. J., Mudge, J. M., Morales, J., Perry, E., Ruffier, M., Tate, J., Thybert, D., Trevanion, S. J., Cunningham, F., Yates, A. D., Zerbino, D. R., & Flicek, P. (2021, Jan 8). Ensembl 2021. *Nucleic acids research*, *49*(D1), D884-D891. <https://doi.org/10.1093/nar/gkaa942>
- Hwang, S., Alhatlani, B., Arias, A., Caddy, S. L., Christodoulou, C., Cunha, J. B., Emmott, E., Gonzalez-Hernandez, M., Kolawole, A., Lu, J., Rippinger, C., Sorgeloos, F., Thorne, L., Vashist, S., Goodfellow, I., & Wobus, C. E. (2014, May 1). Murine norovirus: propagation, quantification, and genetic manipulation. *Curr Protoc Microbiol*, *33*, 15K 12 11-61. <https://doi.org/10.1002/9780471729259.mc15k02s33>
- Jahun, A. S., Sorgeloos, F., Chaudhry, Y., Arthur, S. E., Hosmillo, M., Georgana, I., Izuagbe, R., & Goodfellow, I. G. (2021). Leaked genomic and mitochondrial DNA contribute to the

host response to noroviruses in a STING-dependent manner. *bioRxiv*, 2021.2008.2026.457800. <https://doi.org/10.1101/2021.08.26.457800>

Koepke, L., Gack, M. U., & Sparrer, K. M. (2021, Feb). The antiviral activities of TRIM proteins. *Current opinion in microbiology*, 59, 50-57. <https://doi.org/10.1016/j.mib.2020.07.005>

Kumar, S., Stecher, G., Suleski, M., & Hedges, S. B. (2017, Jul 1). TimeTree: A Resource for Timelines, Timetrees, and Divergence Times. *Mol Biol Evol*, 34(7), 1812-1819. <https://doi.org/10.1093/molbev/msx116>

Lang, X., Tang, T., Jin, T., Ding, C., Zhou, R., & Jiang, W. (2017, Feb). TRIM65-catalized ubiquitination is essential for MDA5-mediated antiviral innate immunity. *The Journal of experimental medicine*, 214(2), 459-473. <https://doi.org/10.1084/jem.20160592>

Liang, X., Xiao, J., Li, X., Wen, Y., Che, X., Ma, Y., Zhang, X., Zhang, Y., Jian, D., Wang, P., Xuan, C., Yu, G., Li, L., & Zhang, H. (2022). Structural insights into the viral proteins binding by TRIM7 reveal a general C-terminal glutamine recognition mechanism. *bioRxiv*, 2022.2003.2024.485560. <https://doi.org/10.1101/2022.03.24.485560>

Lu, M., Zhu, X., Yang, Z., Zhang, W., Sun, Z., Ji, Q., Chen, X., Zhu, J., Wang, C., & Nie, S. (2019, May). E3 ubiquitin ligase tripartite motif 7 positively regulates the TLR4-mediated immune response via its E3 ligase domain in macrophages. *Molecular immunology*, 109, 126-133. <https://doi.org/10.1016/j.molimm.2019.01.015>

McCoy, A. J., Grosse-Kunstleve, R. W., Adams, P. D., Winn, M. D., Storoni, L. C., & Read, R. J. (2007, Aug 1). Phaser crystallographic software. *J Appl Crystallogr*, 40(Pt 4), 658-674. <https://doi.org/10.1107/S0021889807021206>

McKenna, S., Spyropoulos, L., Moraes, T., Pastushok, L., Ptak, C., Xiao, W., & Ellison, M. J. (2001, Oct 26). Noncovalent interaction between ubiquitin and the human DNA repair protein Mms2 is required for Ubc13-mediated polyubiquitination. *The Journal of biological chemistry*, 276(43), 40120-40126. <https://doi.org/10.1074/jbc.M102858200>

Murshudov, G. N., Skubak, P., Lebedev, A. A., Pannu, N. S., Steiner, R. A., Nicholls, R. A., Winn, M. D., Long, F., & Vagin, A. A. (2011, Apr). REFMAC5 for the refinement of macromolecular crystal structures. *Acta Crystallogr D Biol Crystallogr*, 67(Pt 4), 355-367. <https://doi.org/10.1107/S0907444911001314>

Ohainle, M., Kim, K., Komurlu Keceli, S., Felton, A., Campbell, E., Luban, J., & Emerman, M. (2020, Apr). TRIM34 restricts HIV-1 and SIV capsids in a TRIM5alpha-dependent manner. *PLoS pathogens*, 16(4), e1008507. <https://doi.org/10.1371/journal.ppat.1008507>

Orchard, R. C., Sullender, M. E., Dunlap, B. F., Balce, D. R., Doench, J. G., & Virgin, H. W. (2019, Jan 1). Identification of Antinorovirus Genes in Human Cells Using Genome-

Wide CRISPR Activation Screening. *Journal of virology*, 93(1).

<https://doi.org/10.1128/JVI.01324-18>

Oshiumi, H., Matsumoto, M., Hatakeyama, S., & Seya, T. (2009, Jan 9). Riplet/RNF135, a RING finger protein, ubiquitinates RIG-I to promote interferon-beta induction during the early phase of viral infection. *The Journal of biological chemistry*, 284(2), 807-817. <https://doi.org/10.1074/jbc.M804259200>

Ozato, K., Shin, D. M., Chang, T. H., & Morse, H. C., 3rd. (2008, Oct 6). TRIM family proteins and their emerging roles in innate immunity. *Nature reviews. Immunology*. [http://www.ncbi.nlm.nih.gov/entrez/query.fcgi?cmd=Retrieve&db=PubMed&dopt=Citation&list\\_uids=18836477](http://www.ncbi.nlm.nih.gov/entrez/query.fcgi?cmd=Retrieve&db=PubMed&dopt=Citation&list_uids=18836477)

Patil, G., Xu, L., Wu, Y., Song, K., Hao, W., Hua, F., Wang, L., & Li, S. (2020, Jan 22). TRIM41-Mediated Ubiquitination of Nucleoprotein Limits Vesicular Stomatitis Virus Infection. *Viruses*, 12(2). <https://doi.org/10.3390/v12020131>

Reymond, A., Meroni, G., Fantozzi, A., Merla, G., Cairo, S., Luzi, L., Riganelli, D., Zanaria, E., Messali, S., Cainarca, S., Guffanti, A., Minucci, S., Pelicci, P. G., & Ballabio, A. (2001, May 1). The tripartite motif family identifies cell compartments [Research Support, Non-U.S. Gov't]. *The EMBO journal*, 20(9), 2140-2151. <https://doi.org/10.1093/emboj/20.9.2140>

Sardiello, M., Cairo, S., Fontanella, B., Ballabio, A., & Meroni, G. (2008, Aug 1). Genomic analysis of the TRIM family reveals two groups of genes with distinct evolutionary properties. *BMC Evol Biol*, 8, 225. <https://doi.org/10.1186/1471-2148-8-225>

Seo, G. J., Kim, C., Shin, W. J., Sklan, E. H., Eoh, H., & Jung, J. U. (2018, Feb 9). TRIM56-mediated monoubiquitination of cGAS for cytosolic DNA sensing. *Nature communications*, 9(1), 613. <https://doi.org/10.1038/s41467-018-02936-3>

Skurat, A. V., Dietrich, A. D., Zhai, L., & Roach, P. J. (2002, May 31). GNIP, a novel protein that binds and activates glycogenin, the self-glucosylating initiator of glycogen biosynthesis. *The Journal of biological chemistry*, 277(22), 19331-19338. <https://doi.org/10.1074/jbc.M201190200>

Sriram, S. M., & Kwon, Y. T. (2010, Oct). The molecular principles of N-end rule recognition. *Nature structural & molecular biology*, 17(10), 1164-1165. <https://doi.org/10.1038/nsmb1010-1164>

Stamatakis, A. (2014, May 1). RAxML version 8: a tool for phylogenetic analysis and post-analysis of large phylogenies. *Bioinformatics*, 30(9), 1312-1313. <https://doi.org/10.1093/bioinformatics/btu033>

Stremlau, M., Owens, C. M., Perron, M. J., Kiessling, M., Autissier, P., & Sodroski, J. (2004, Feb 26). The cytoplasmic body component TRIM5alpha restricts HIV-1 infection in Old World monkeys. *Nature*, 427(6977), 848-853.

[http://www.ncbi.nlm.nih.gov/entrez/query.fcgi?cmd=Retrieve&db=PubMed&dopt=Citation&list\\_uids=14985764](http://www.ncbi.nlm.nih.gov/entrez/query.fcgi?cmd=Retrieve&db=PubMed&dopt=Citation&list_uids=14985764)

- Uchil, P. D., Hinz, A., Siegel, S., Coenen-Stass, A., Pertel, T., Luban, J., & Mothes, W. (2013, Jan). TRIM protein-mediated regulation of inflammatory and innate immune signaling and its association with antiretroviral activity [Research Support, N.I.H., Extramural]. *Journal of virology*, 87(1), 257-272. <https://doi.org/10.1128/JVI.01804-12>
- Uchil, P. D., Quinlan, B. D., Chan, W. T., Luna, J. M., & Mothes, W. (2008, Feb 1). TRIM E3 Ligases Interfere with Early and Late Stages of the Retroviral Life Cycle. *PLoS pathogens*, 4(2), e16. [http://www.ncbi.nlm.nih.gov/entrez/query.fcgi?cmd=Retrieve&db=PubMed&dopt=Citation&list\\_uids=18248090](http://www.ncbi.nlm.nih.gov/entrez/query.fcgi?cmd=Retrieve&db=PubMed&dopt=Citation&list_uids=18248090)
- Winter, G., & McAuley, K. E. (2011, Sep). Automated data collection for macromolecular crystallography. *Methods*, 55(1), 81-93. <https://doi.org/10.1016/j.ymeth.2011.06.010>
- Winter, G., Waterman, D. G., Parkhurst, J. M., Brewster, A. S., Gildea, R. J., Gerstel, M., Fuentes-Montero, L., Vollmar, M., Michels-Clark, T., Young, I. D., Sauter, N. K., & Evans, G. (2018, Feb 1). DIALS: implementation and evaluation of a new integration package. *Acta Crystallogr D Struct Biol*, 74(Pt 2), 85-97. <https://doi.org/10.1107/S2059798317017235>
- Wu, X., Wang, J., Wang, S., Wu, F., Chen, Z., Li, C., Cheng, G., & Qin, F. X. (2019). Inhibition of Influenza A Virus Replication by TRIM14 via Its Multifaceted Protein-Protein Interaction With NP. *Frontiers in microbiology*, 10, 344. <https://doi.org/10.3389/fmicb.2019.00344>
- Yuan, T., Yao, W., Tokunaga, K., Yang, R., & Sun, B. (2016, Oct 13). An HIV-1 capsid binding protein TRIM11 accelerates viral uncoating. *Retrovirology*, 13(1), 72. <https://doi.org/10.1186/s12977-016-0306-5>
- Zeng, J., Santos, A. F., Mukadam, A. S., Osswald, M., Jacques, D. A., Dickson, C. F., McLaughlin, S. H., Johnson, C. M., Kiss, L., Luptak, J., Renner, N., Vaysburd, M., McEwan, W. A., Morais-de-Sa, E., Clift, D., & James, L. C. (2021, Mar). Target-induced clustering activates Trim-Away of pathogens and proteins. *Nature structural & molecular biology*, 28(3), 278-289. <https://doi.org/10.1038/s41594-021-00560-2>
- Zhai, L., Dietrich, A., Skurat, A. V., & Roach, P. J. (2004, Jan 15). Structure-function analysis of GNIP, the glycogenin-interacting protein. *Arch Biochem Biophys*, 421(2), 236-242. <https://doi.org/10.1016/j.abb.2003.11.017>
- Zhu, L., Qin, C., Li, T., Ma, X., Qiu, Y., Lin, Y., Ma, D., Qin, Z., Sun, C., Shen, X., Zhao, Y., & Han, L. (2020, Jun). The E3 ubiquitin ligase TRIM7 suppressed hepatocellular carcinoma

progression by directly targeting Src protein. *Cell death and differentiation*, 27(6), 1819-1831. <https://doi.org/10.1038/s41418-019-0464-9>

# Figure 1

A

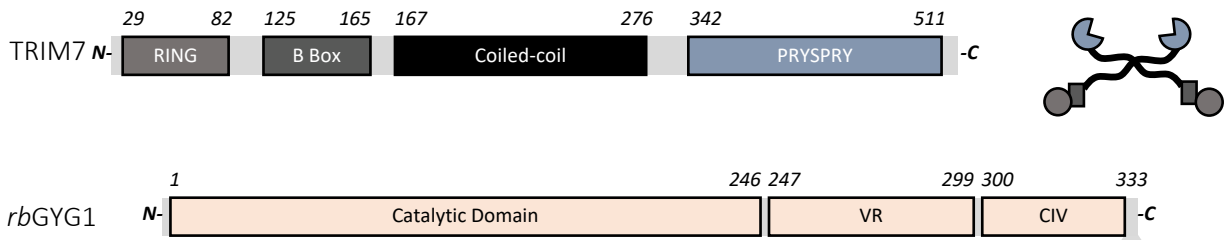

B

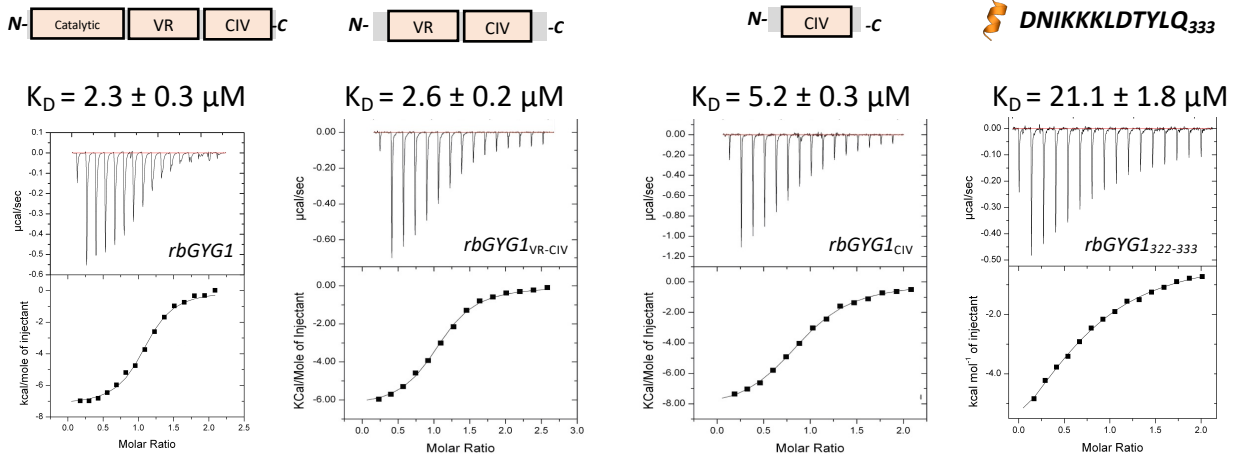

C

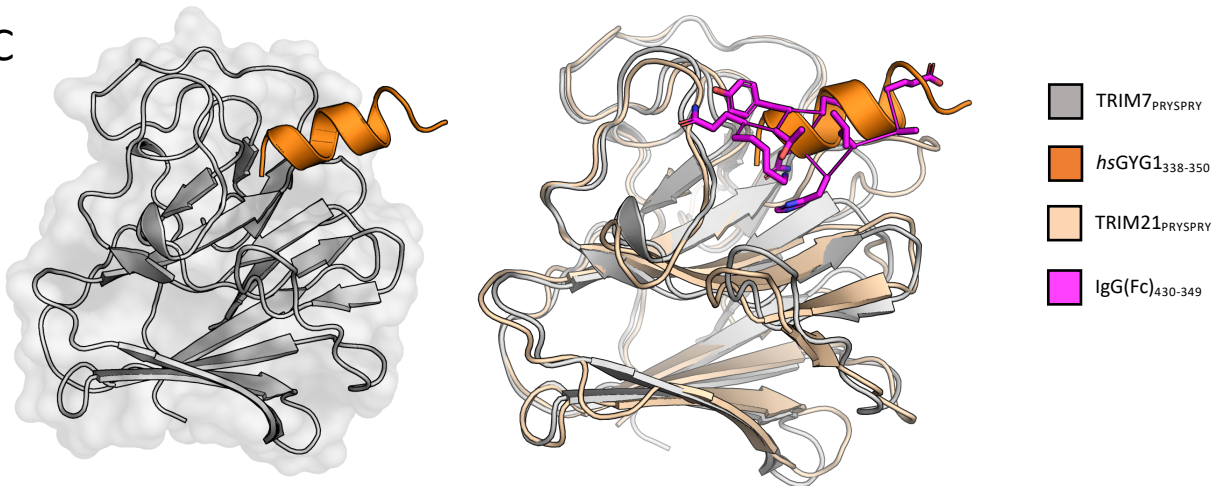



**Figure 2**

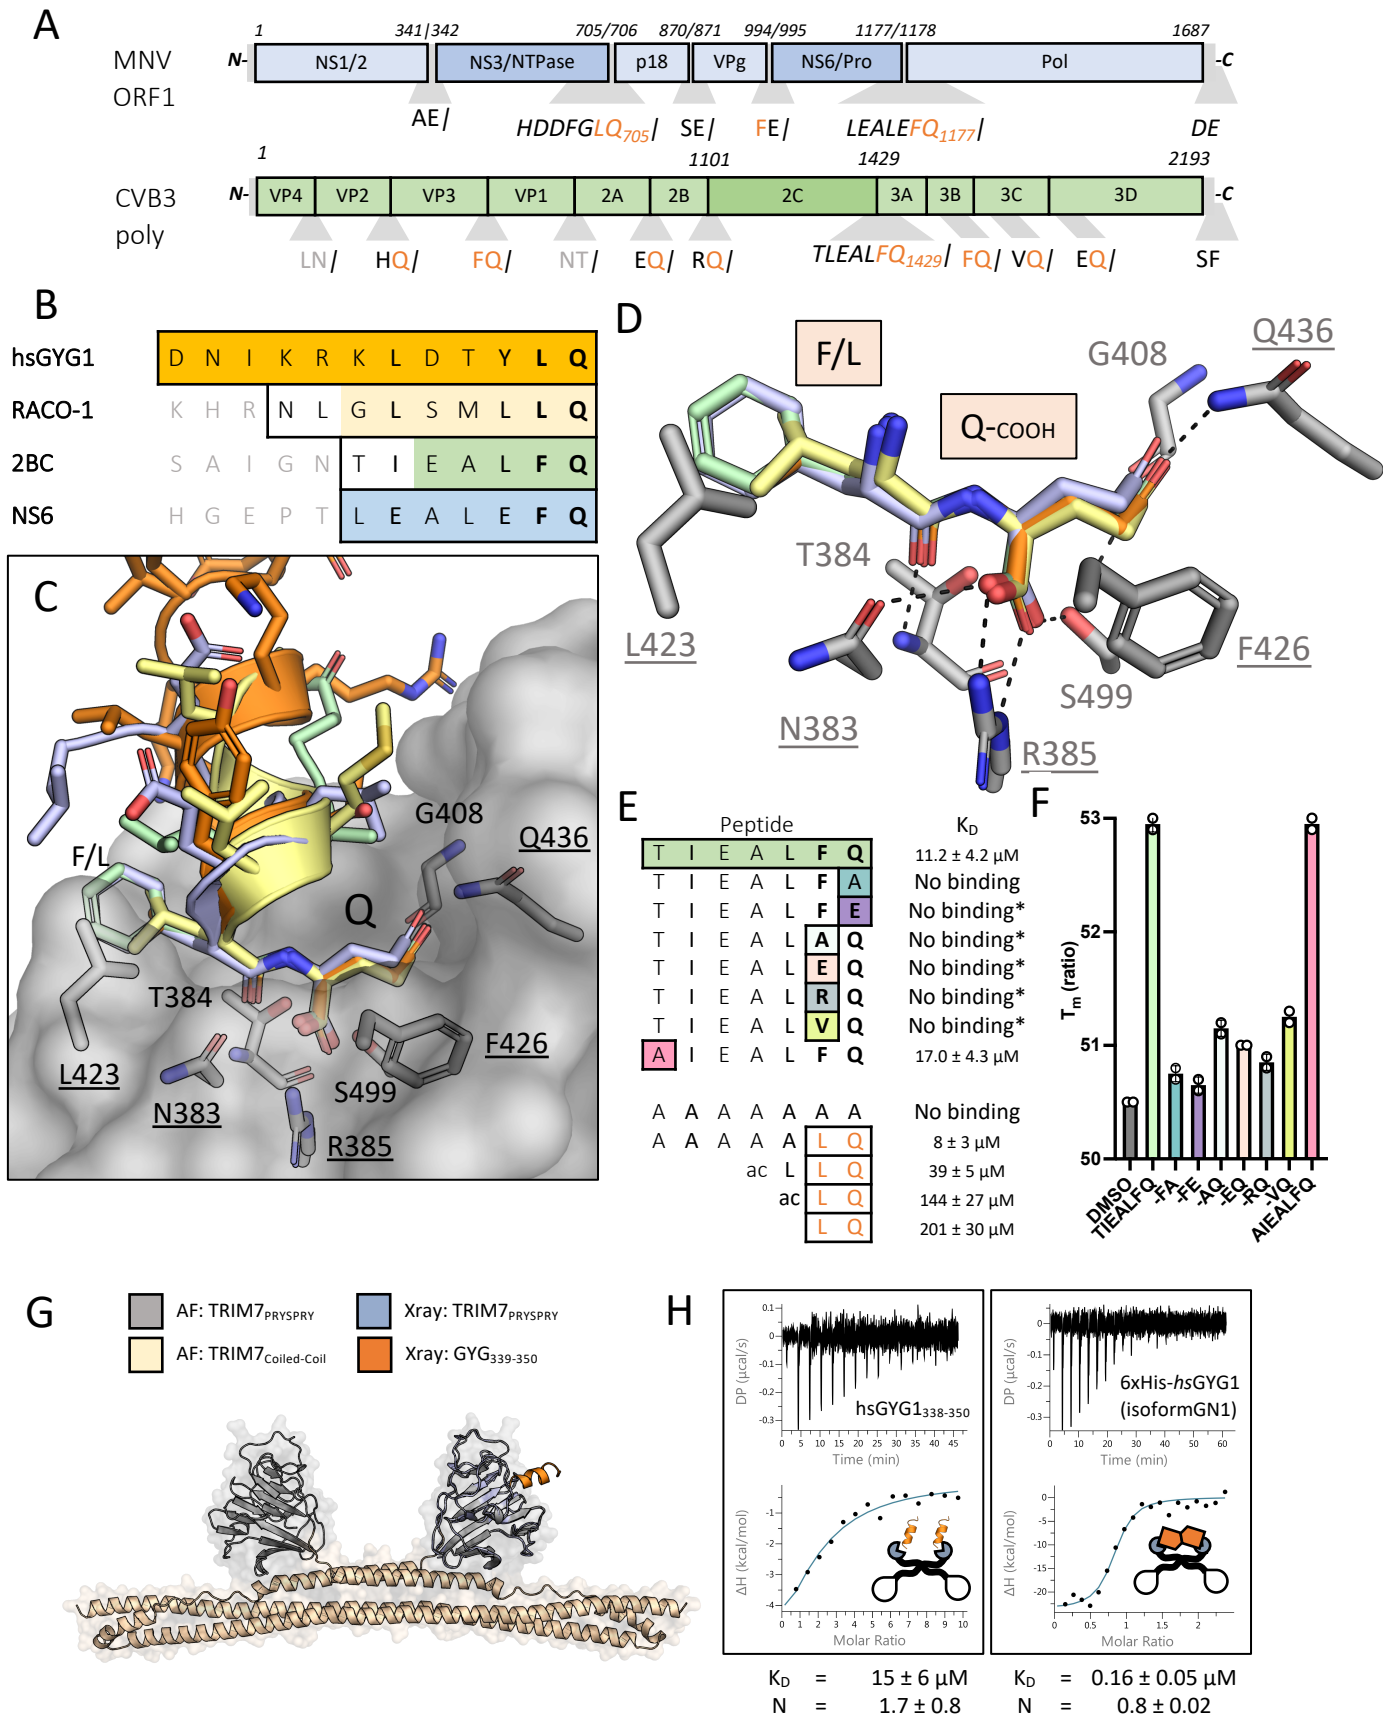

**Figure 3**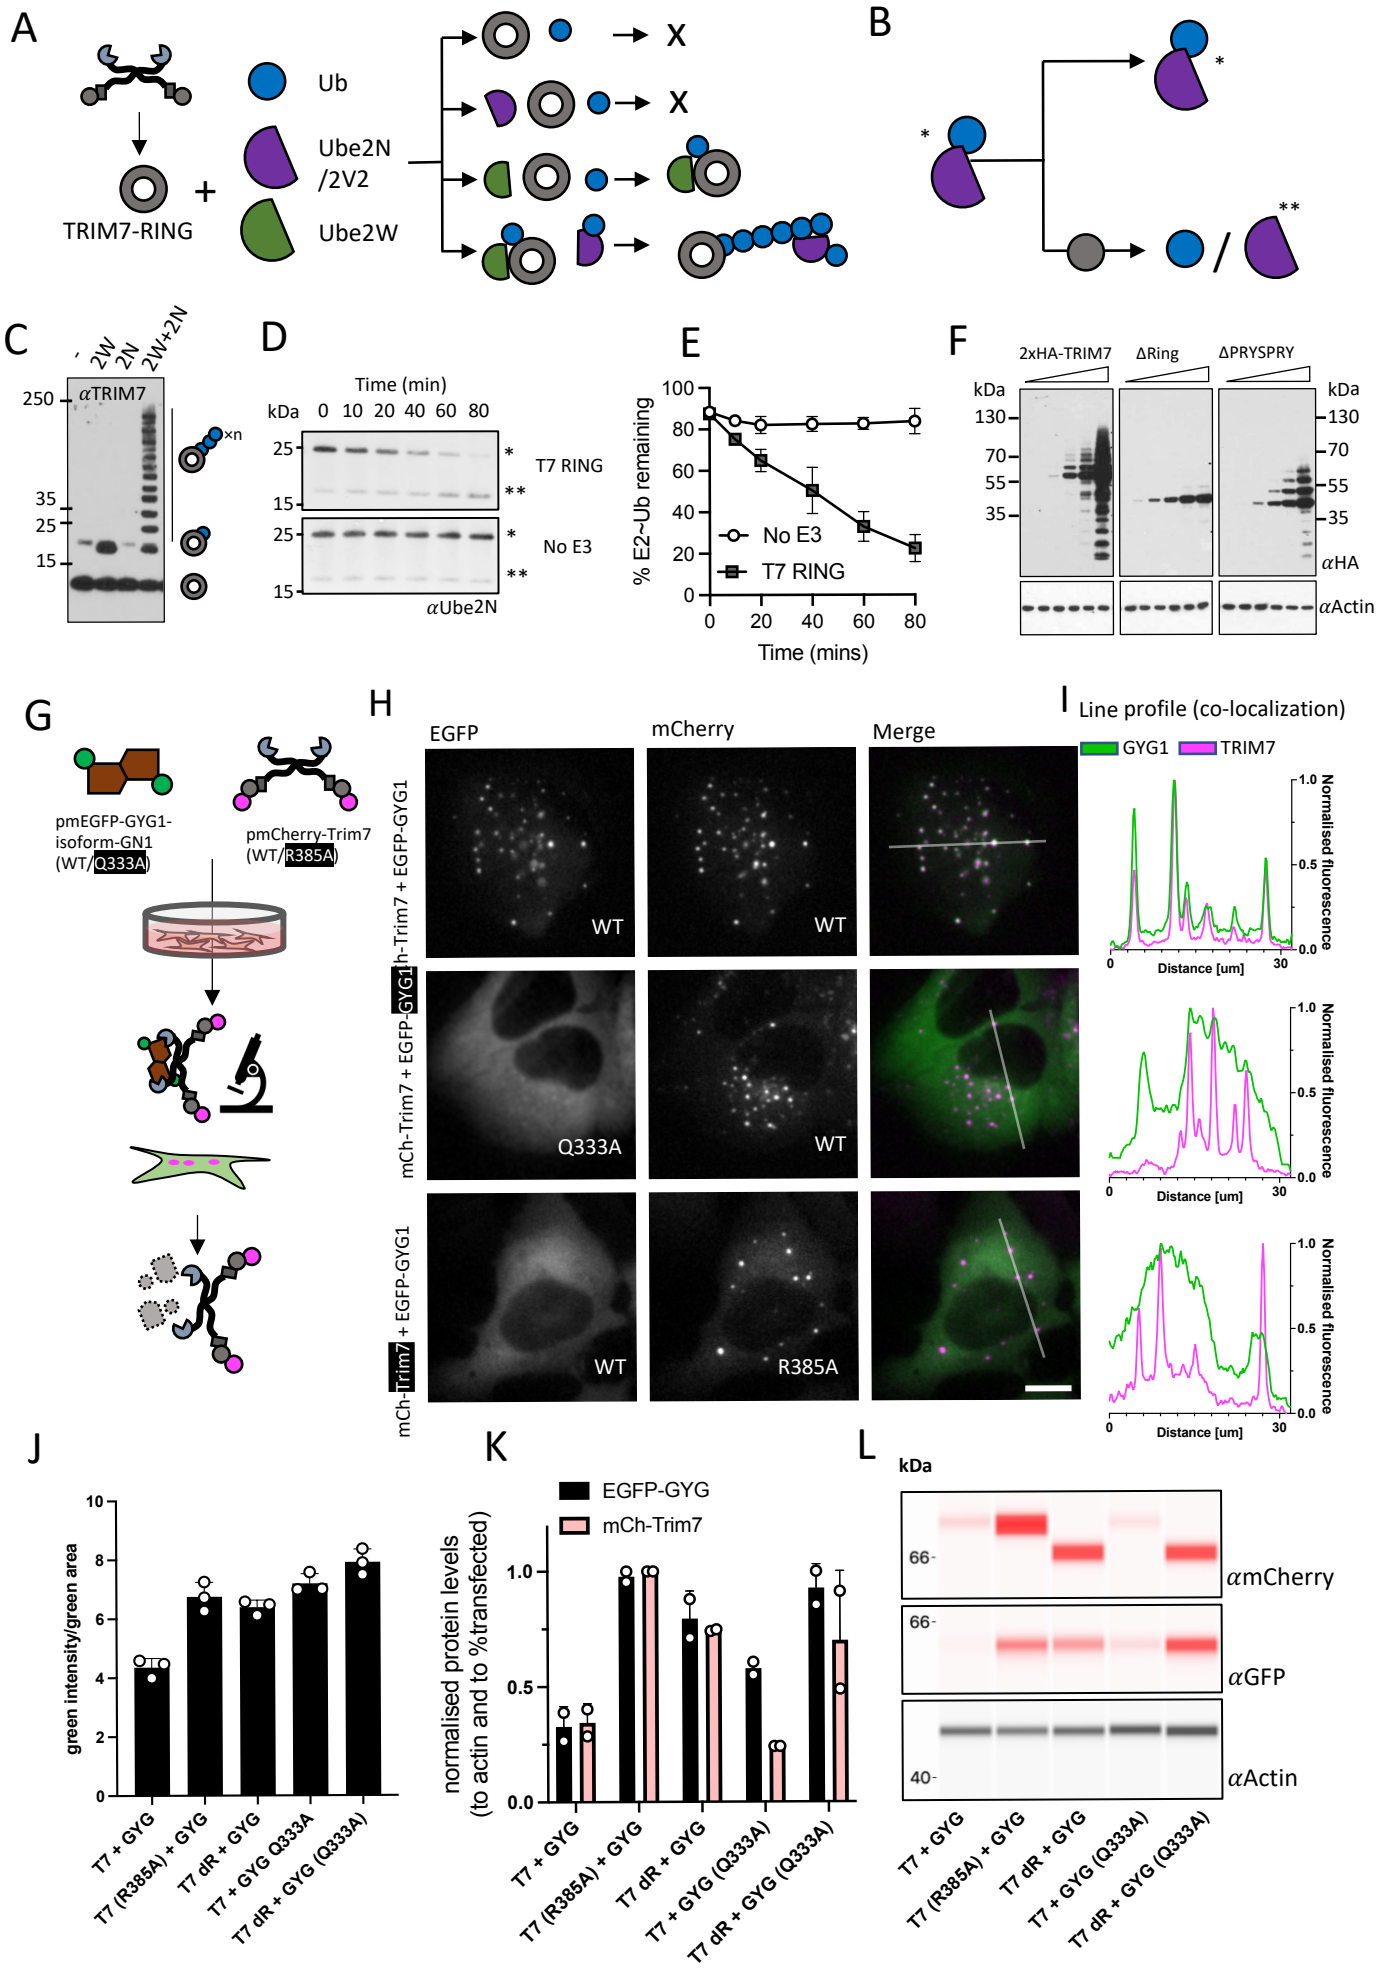

**Figure 4**

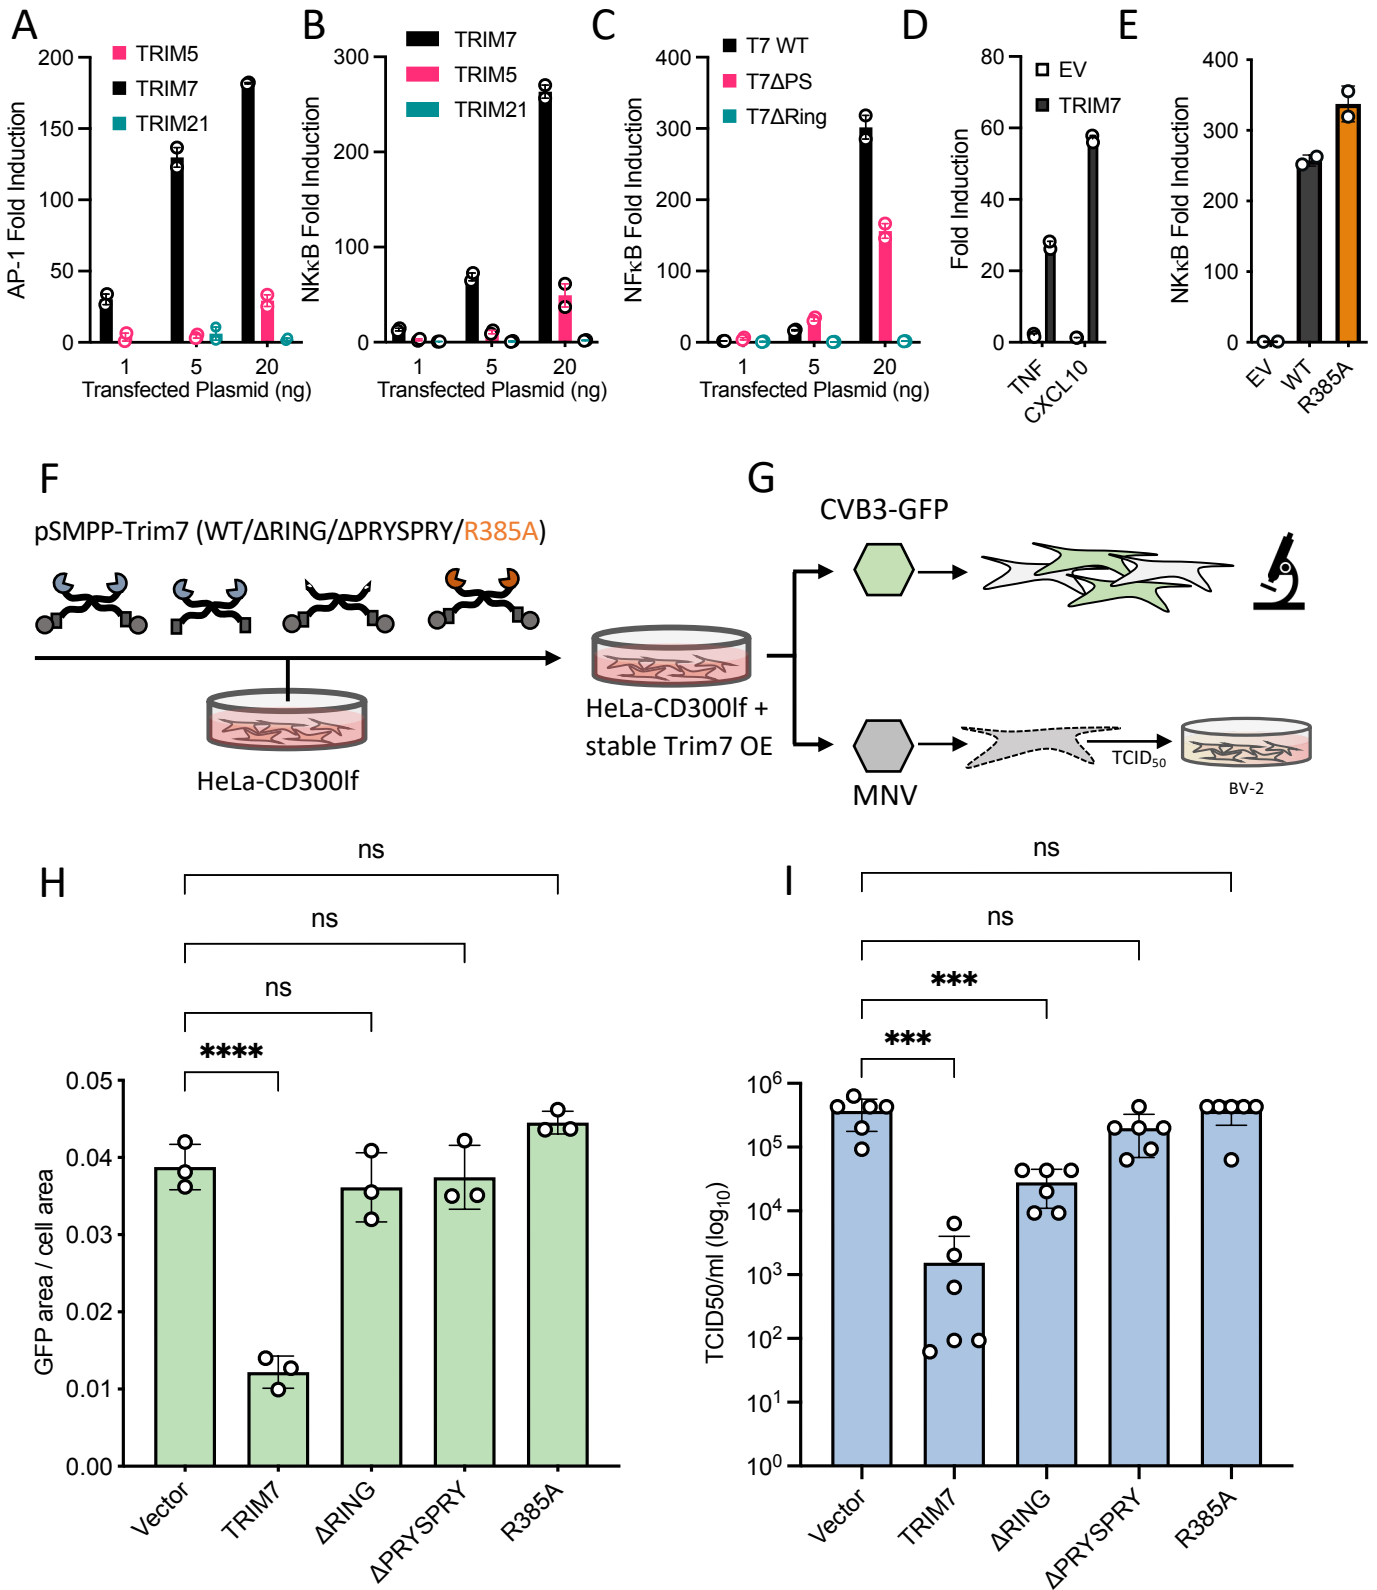

Source: https://www.biorxiv.org/content/10.1101/2022.06.28.497919v1.full.pdf
